# Supplementary material for: Synthesis, ADMT prediction, and in vitro and in silico α-glucosidase inhibition evaluations of new quinoline–quinazolinone–thioacetamides
Source: Royal Society of Chemistry journal article supplement (doi:10.1039/d3ra01790g), 2023-01-01

## Support information

### Synthesis, ADMT prediction, *in vitro*, and *in silico* $\alpha$ -glucosidase inhibition evaluations of new quinoline-quinazolinone-thioacetamides

Sajedeh Safapoor,<sup>a</sup> Mohammad Halimi,<sup>b</sup> Minoos Khalili Ghomi,<sup>a</sup> Milad Noori,<sup>c</sup> Navid Dastyaftehd,<sup>c</sup> Shahrzad Javanshir,<sup>c</sup> Samanesadat Hosseini,<sup>d</sup> Somayeh Mojtavavi,<sup>e</sup> Mohammad Ali Faramarzi,<sup>c</sup> Ensieh Nasli-Esfahani,<sup>f</sup> Bagher Larijani,<sup>a</sup> Azadeh Fakhriolaei,<sup>g</sup> Mohammad G. Dekamin,<sup>c</sup> Maryam Mohammadi-Khanaposhtani,<sup>h</sup> Mohammad Mahdavi<sup>a</sup>

<sup>a</sup>Endocrinology and Metabolism Research Center, Endocrinology and Metabolism Clinical Sciences Institute, Tehran University of Medical Sciences, Tehran, Iran. E-mail: [momahdavi@tums.ac.ir](mailto:momahdavi@tums.ac.ir)

<sup>b</sup>Department of Biology, Babol Branch, Islamic Azad University, Babol, Iran

<sup>c</sup>Pharmaceutical and Heterocyclic Chemistry Research Laboratory, Department of Chemistry, Iran University of Science and Technology, Tehran, 16846-13114, Iran

<sup>d</sup>Shahid Beheshti University of Medical Sciences, Tehran, Iran

<sup>e</sup>Department of Pharmaceutical Biotechnology, Faculty of Pharmacy, Tehran University of Medical Sciences, Tehran, Iran

<sup>f</sup>Diabetes Research Center, Endocrinology and Metabolism Clinical Sciences Institute, Tehran University of Medical Sciences, Tehran, Iran

<sup>g</sup>Faculty of Pharmacy, Pharmaceutical Sciences Branch, Islamic Azad University, Tehran, Iran

<sup>h</sup>Cellular and Molecular Biology Research Center, Health Research Institute, Babol University of Medical Sciences, Babol, Iran. E-mail: [maryammoha@gmail.com](mailto:maryammoha@gmail.com)

2-chloroquinoline-3-carbaldehyde (2):

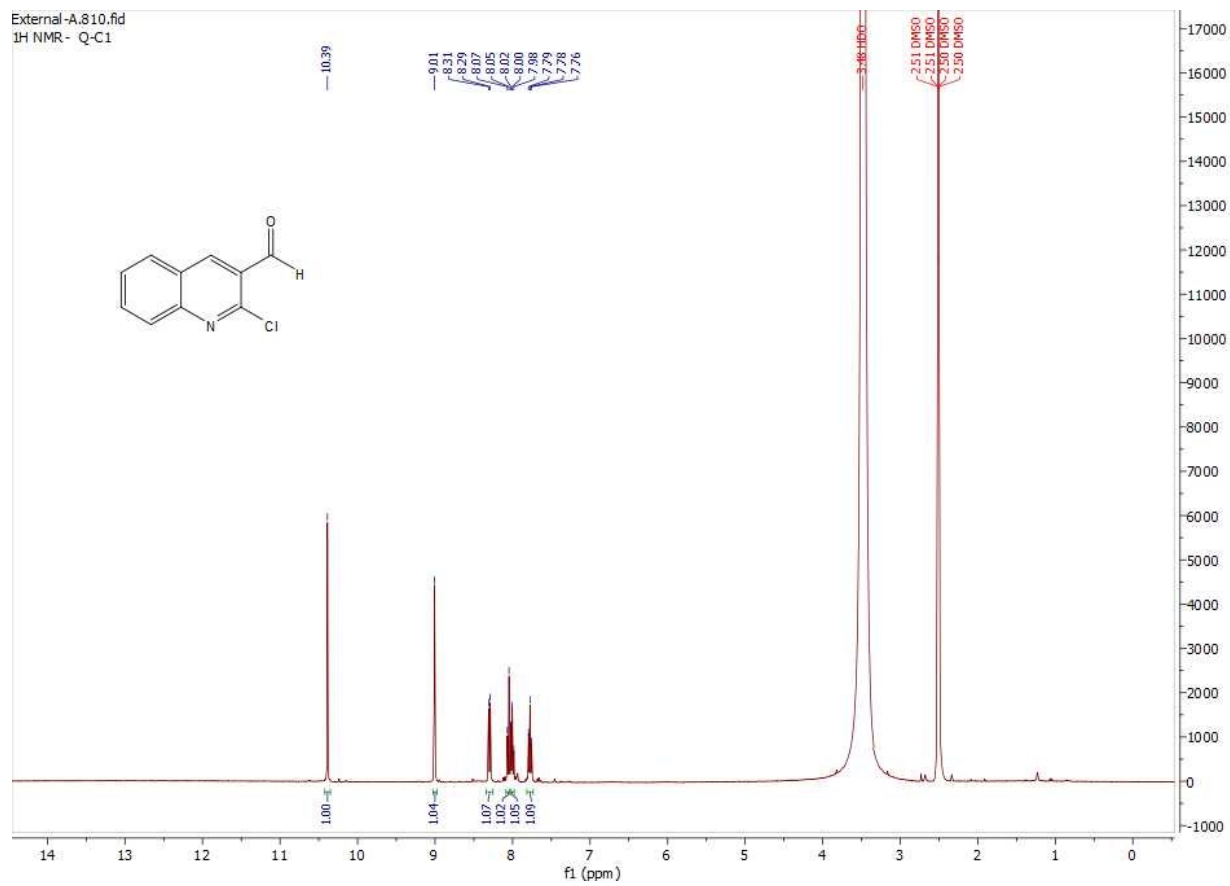

External-A.811.fid  
13C NMR- Q-C1

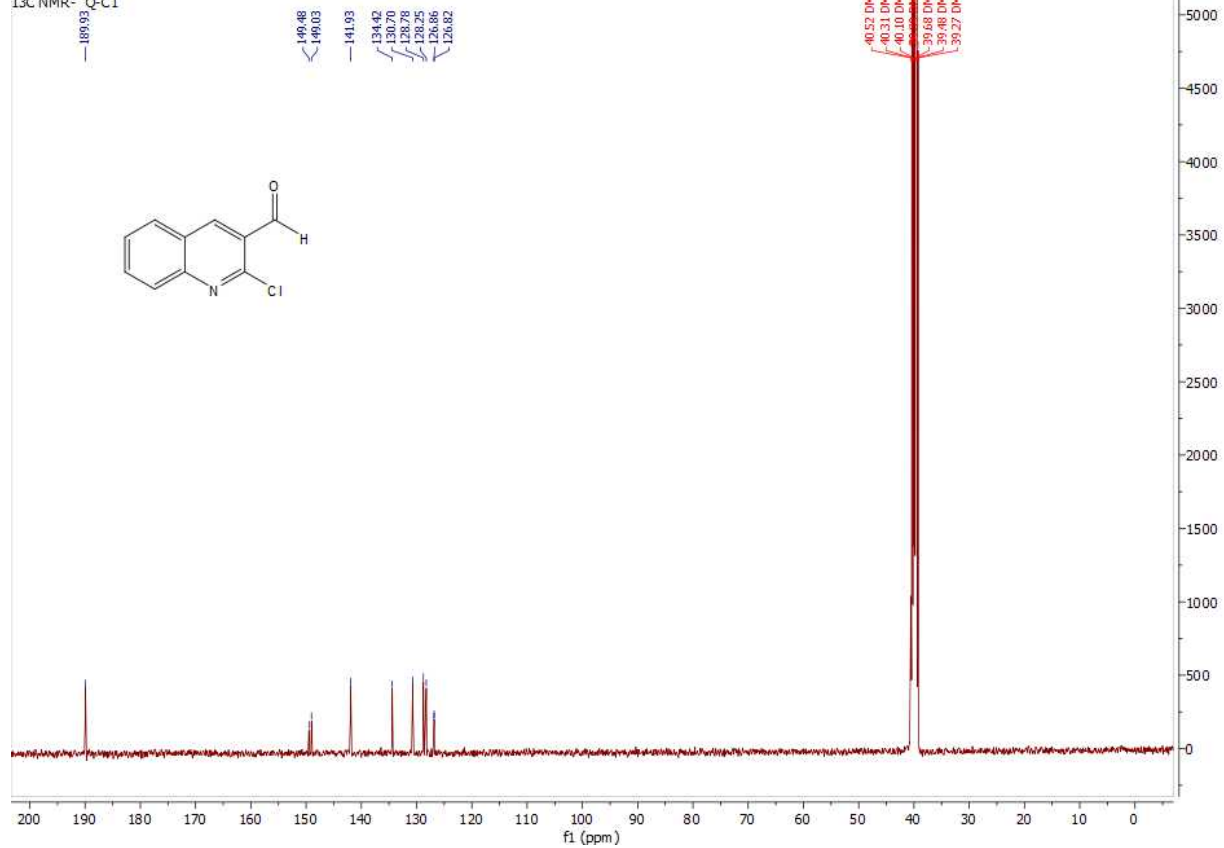

2-mercaptoquinoline-3-carbaldehyde (3):

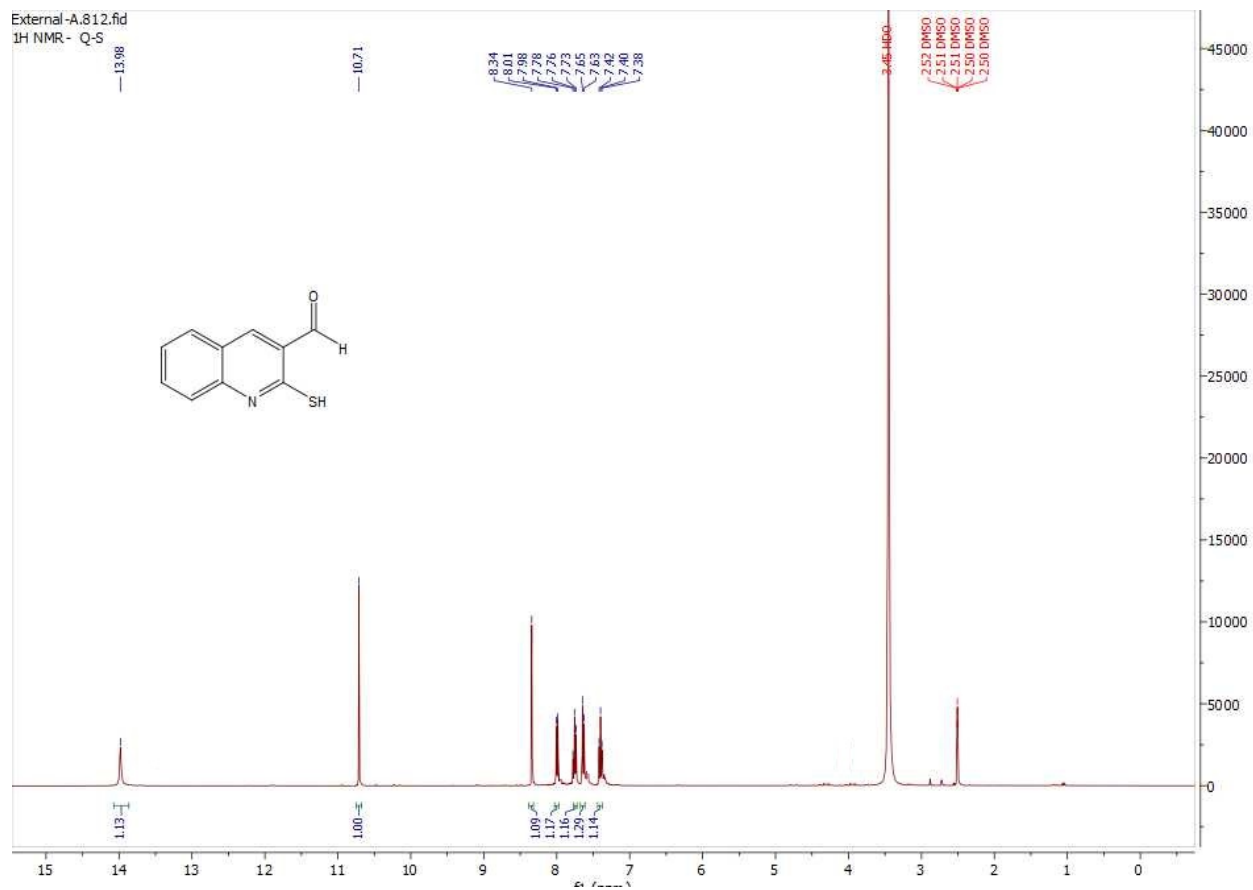

External-A.813.fid

13C NMR- Q-S

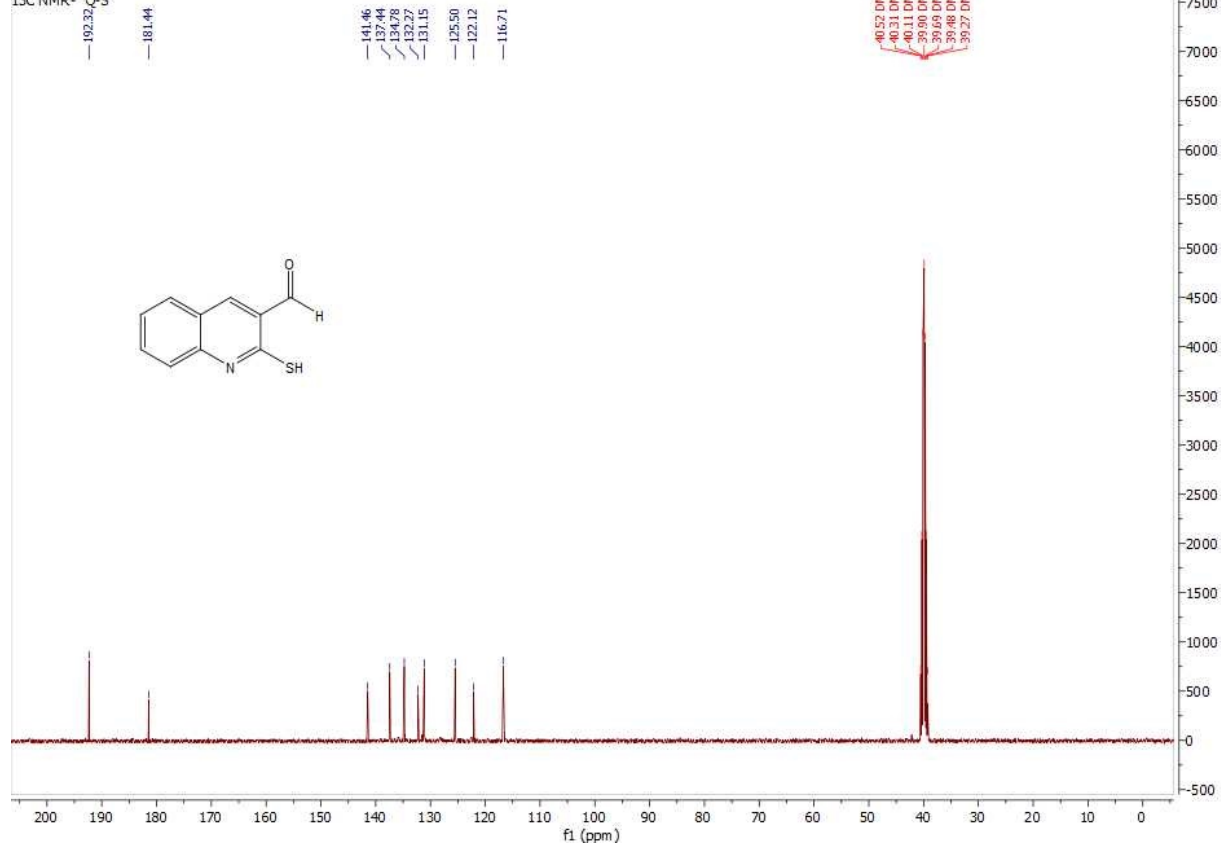

# 2-(2-mercaptoquinolin-3-yl)quinazolin-4(3H)-one

External-A,17.fid  
1H NMR - S3-A COH

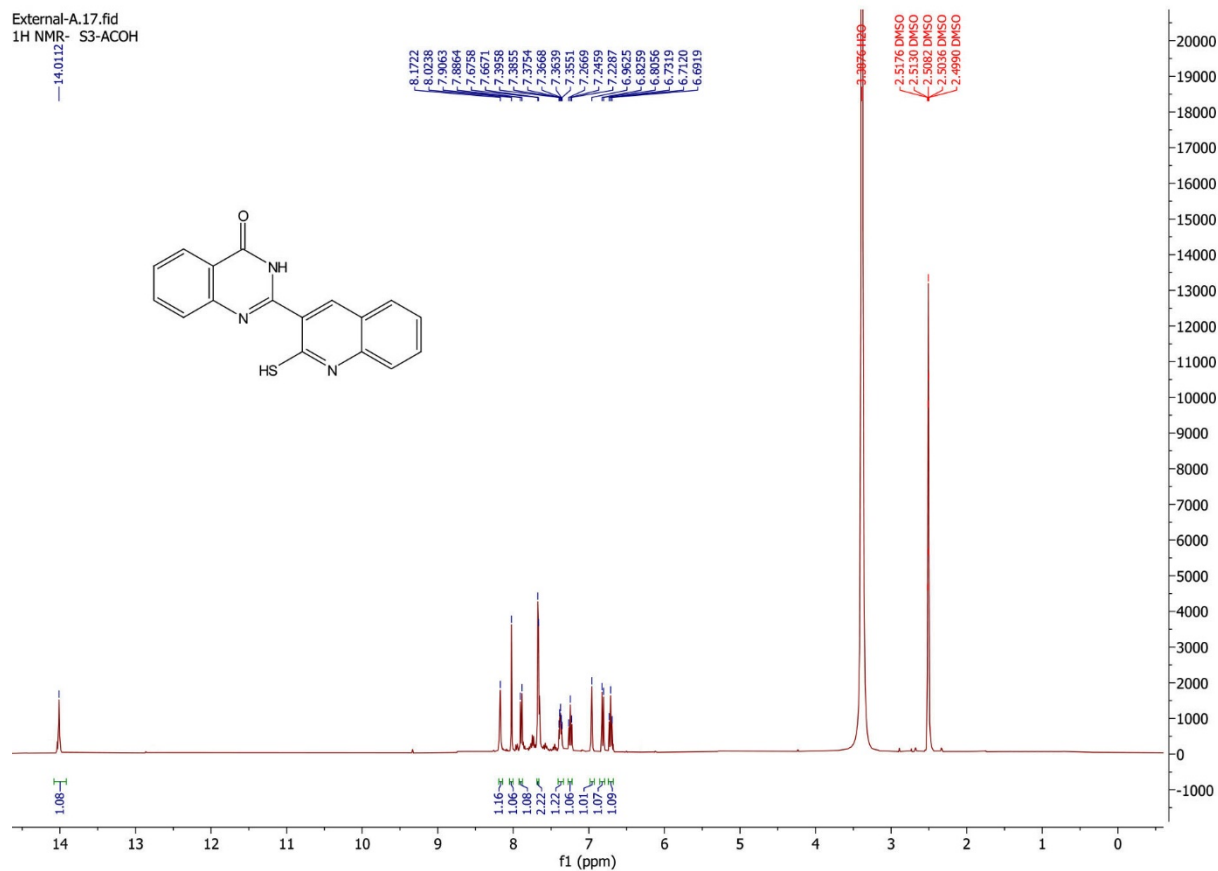

External-A.19.fid  
13C NMR- S3-ACOH

179.7610  
172.5719  
164.1666

147.7569  
138.1391  
138.6983  
134.0122  
133.0274  
132.3129  
128.9471  
127.9485  
125.1122  
123.1659  
118.1334  
116.5928  
115.3724  
115.0362

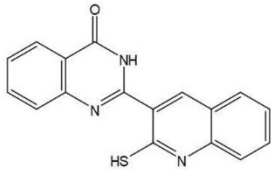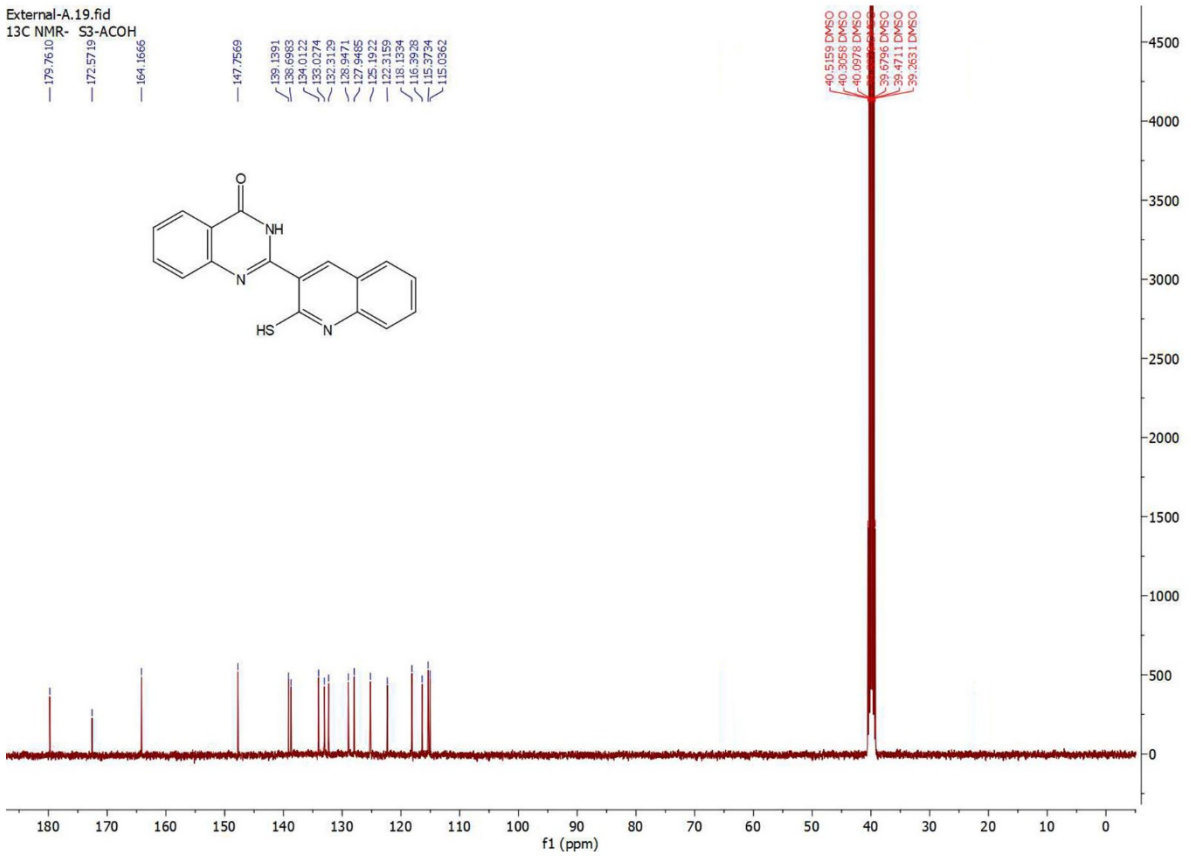

File :C:\MSDCHEM\3\DATA\Snapshot\TEST 2214.D  
Operator :  
Acquired : 28 Jul 2007 3:35 using AcqMethod test000414.M  
Instrument : MSD  
Sample Name: intermediate mm6  
Misc Info :  
Vial Number: 1

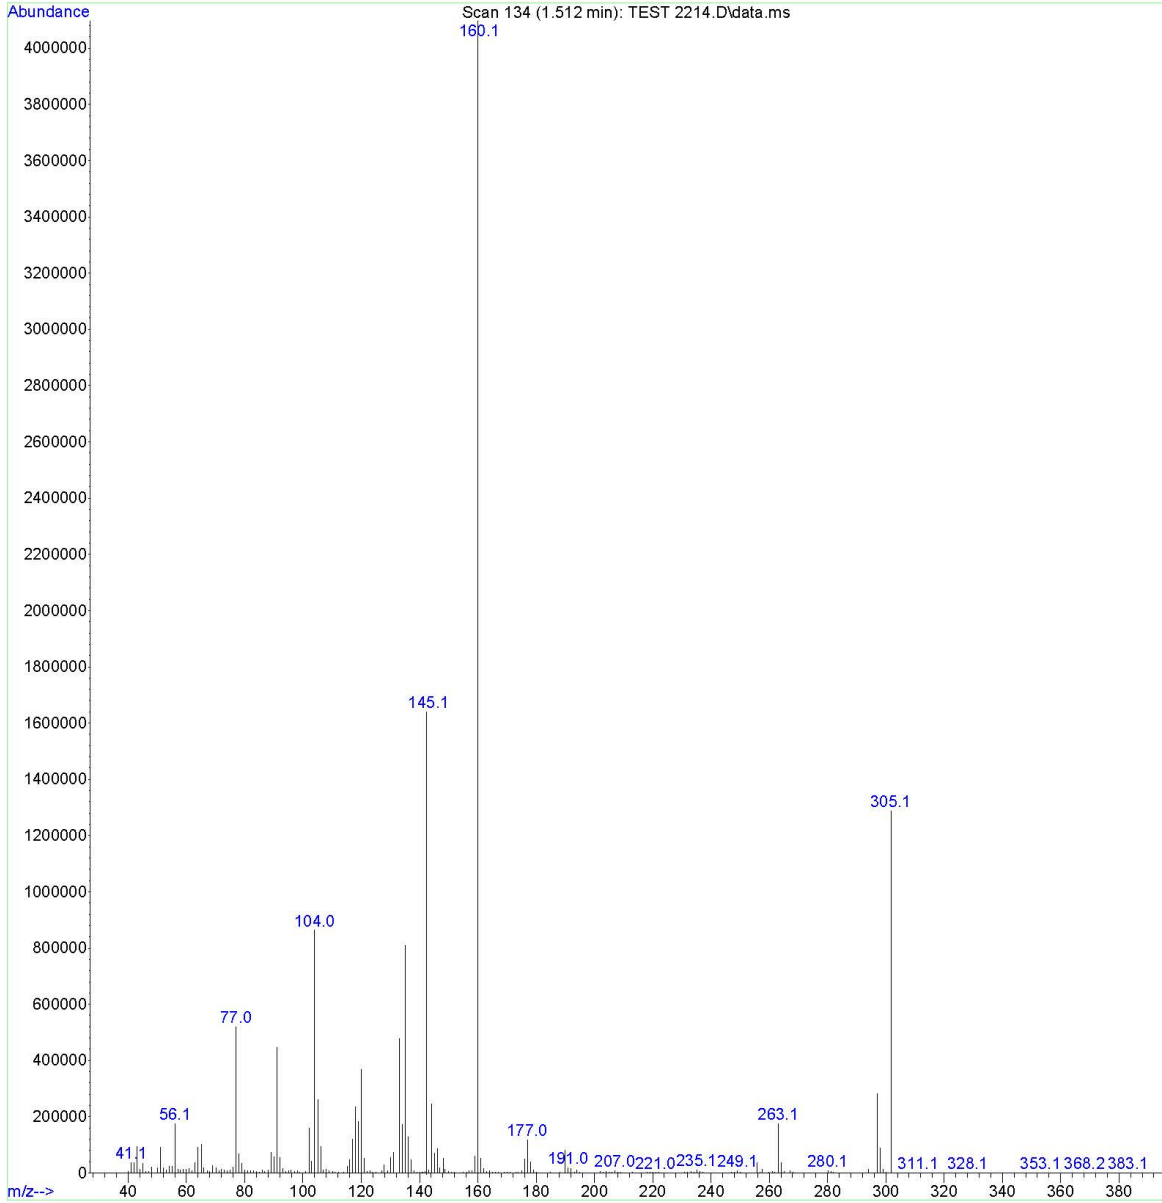



2- $\{[3-(4\text{-Oxo-}3,4\text{-dihydroquinazolin-}2\text{-yl})\text{ quinolin-}2\text{-yl] thio}\}$ -*N*-phenylacetamide (**9a**)

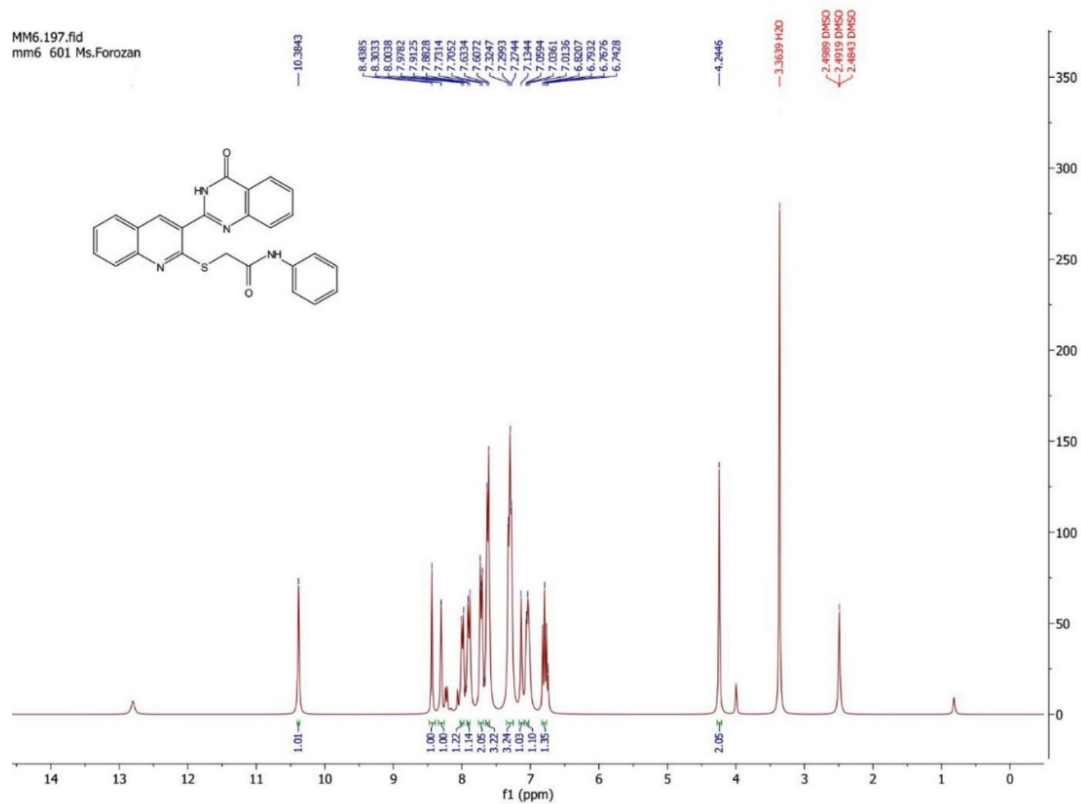

MM6.198.fid  
mm6 601 Ms.Forozan

- 167.0595
- 166.8547
- 166.8074
- 157.0463
- 147.0377
- 147.0350
- 139.2115
- 138.1438
- 135.3898
- 133.4250
- 132.8771
- 127.7773
- 127.3669
- 126.0076
- 125.3011
- 124.3650
- 119.2859
- 118.1422
- 115.0452

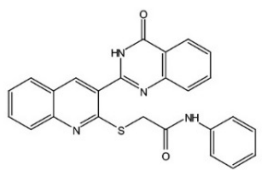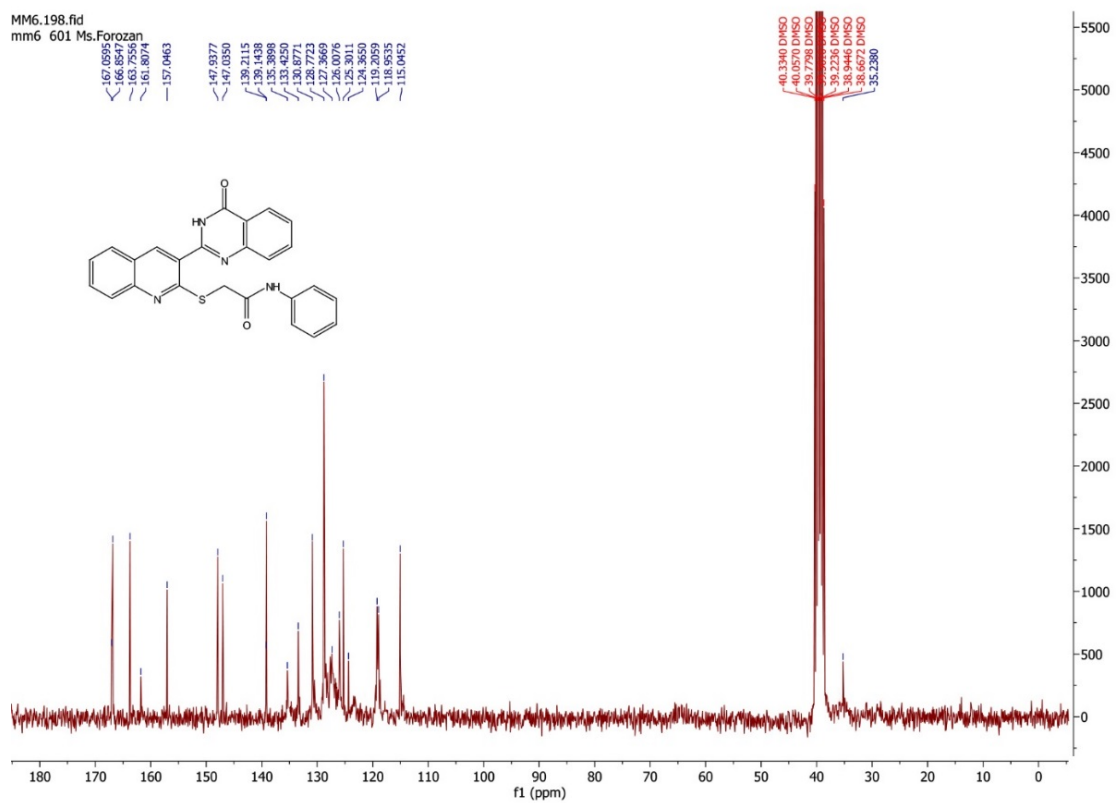

File :C:\MSDCHEM\3\DATA\Snapshot\TEST 2213.D  
Operator :  
Acquired : 28 Jul 2007 3:31 using AcqMethod test000414.M  
Instrument : MSD  
Sample Name: MM6 601  
Misc Info :  
Vial Number: 1

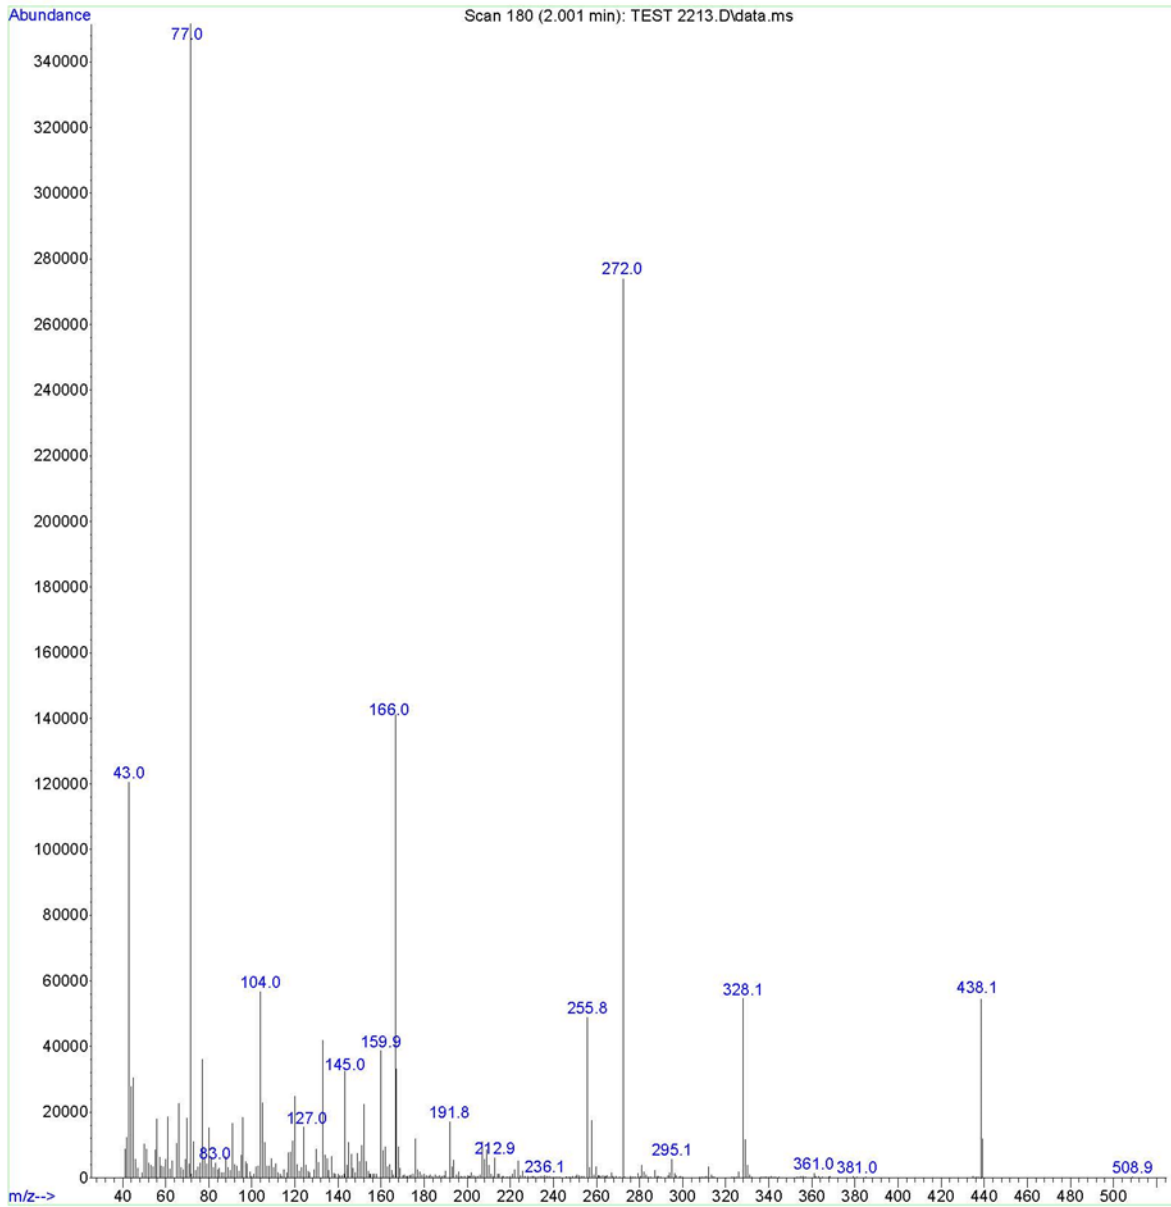

2- $\{[3-(4\text{-Oxo-3,4-dihydroquinazolin-2-yl})\text{quinolin-2-yl}]\text{thio}\}$ - $N$ -( $p$ -tolyl)acetamide (**9b**)

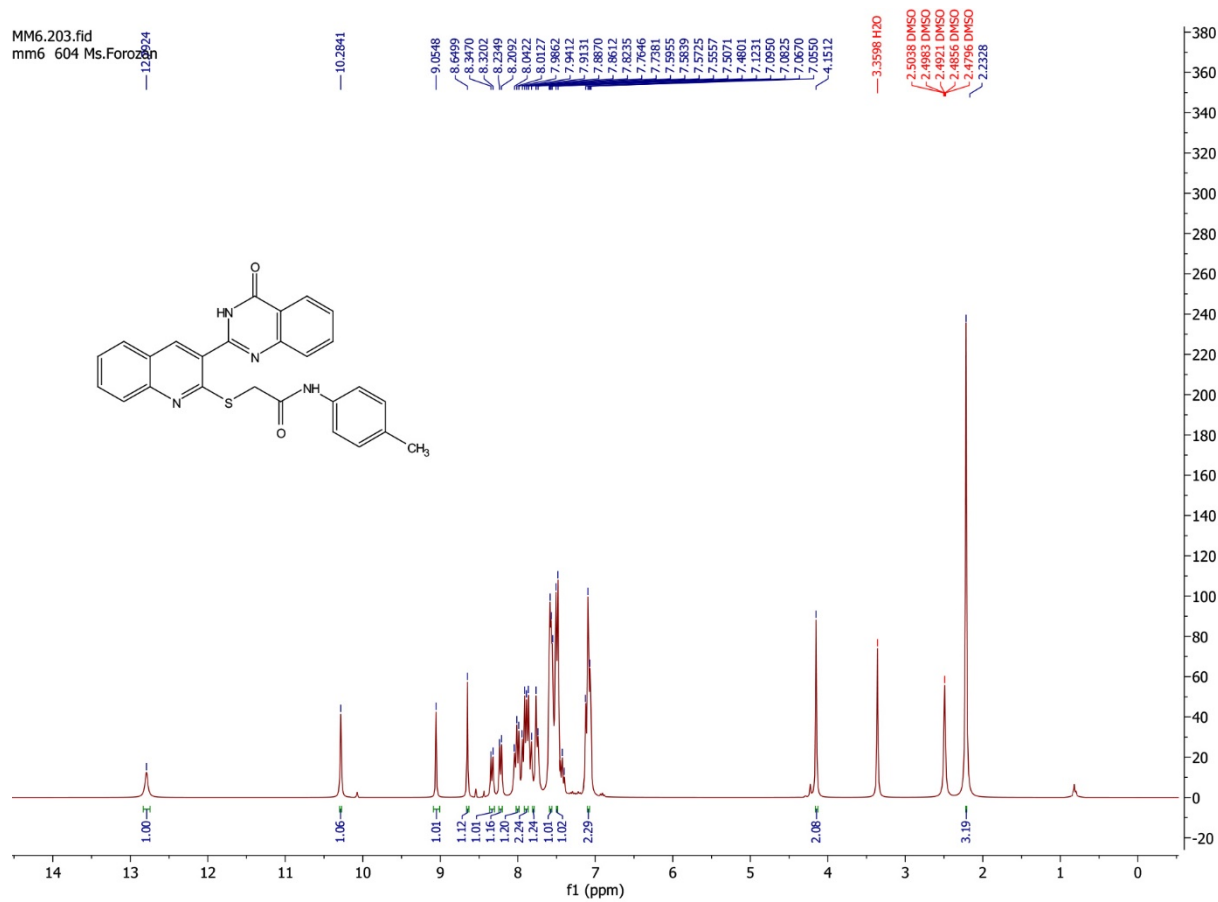

MM6\_204.fid  
mm6 604 Ms.Forozan

- 167.4586
- 165.6426
- 157.0457
- 150.9406
- 147.0784
- 136.7130
- 135.9574
- 132.8274
- 132.1169
- 129.1907
- 126.0083
- 124.3578
- 121.2422
- 119.6500
- 119.0898
- 114.1721

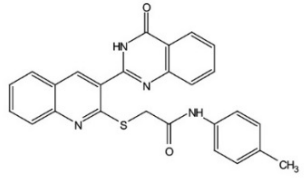

- 40.2464 DMSO
- 39.9990 DMSO
- 39.9990 DMSO
- 39.2346 DMSO
- 38.9951 DMSO
- 38.9951 DMSO
- 35.8973

20.4130

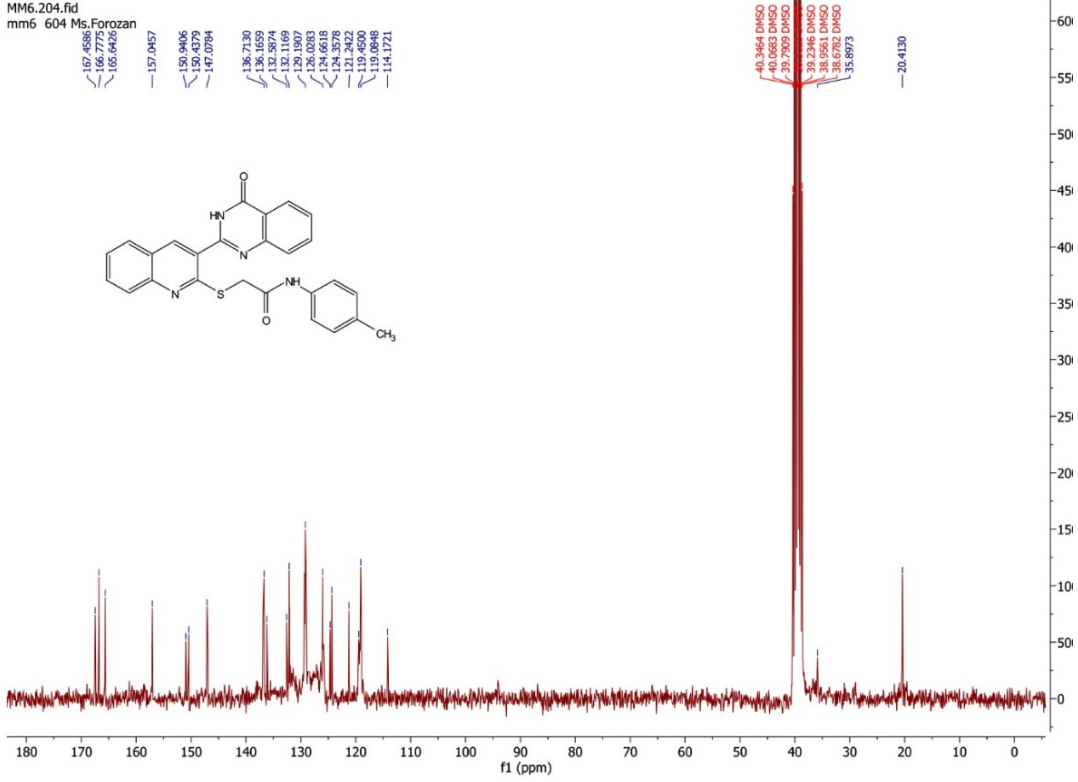

File : C:\MSDCHEM\3\DATA\Snapsho\TEST 2213.D  
Operator :  
Acquired : 28 Jul 2007 3:31 using AcqMethod test000414.M  
Instrument : MSD  
Sample Name: MM6 604  
Misc Info :  
Vial Number: 1

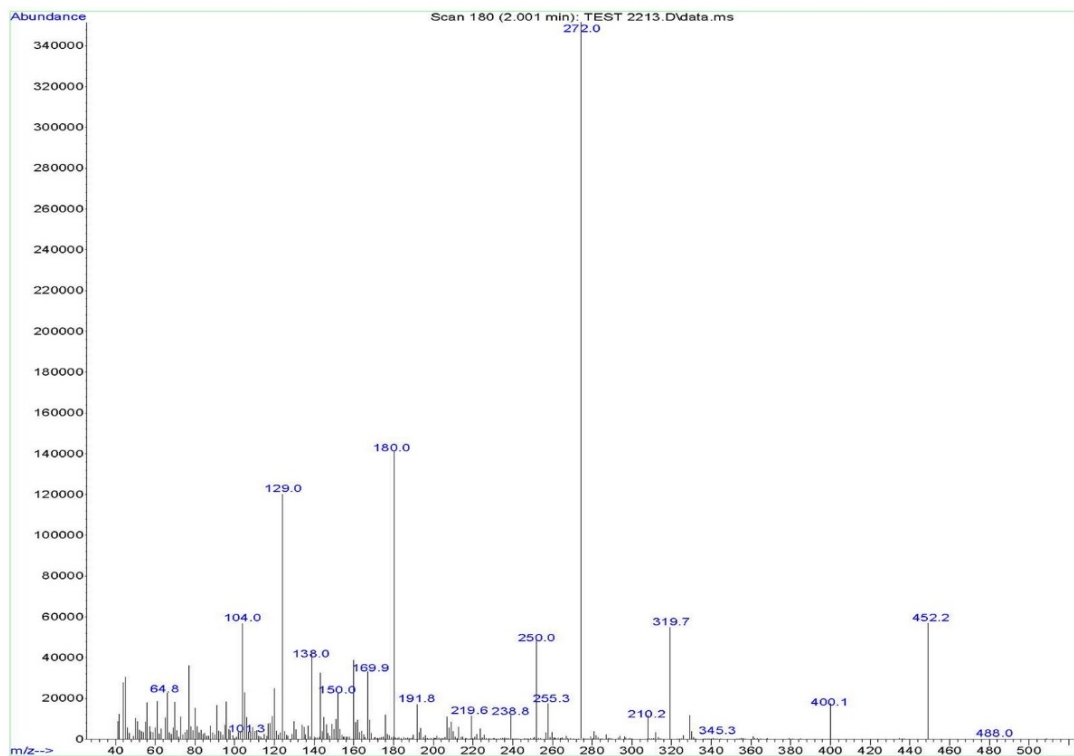

*N*-(2,3-Dimethylphenyl)-2- $\{[3-(4\text{-oxo-}3,4\text{-dihydroquinazolin-}2\text{-yl})\text{quinolin-}2\text{-yl}]\text{thio}\}$ acetamide  
(9c)

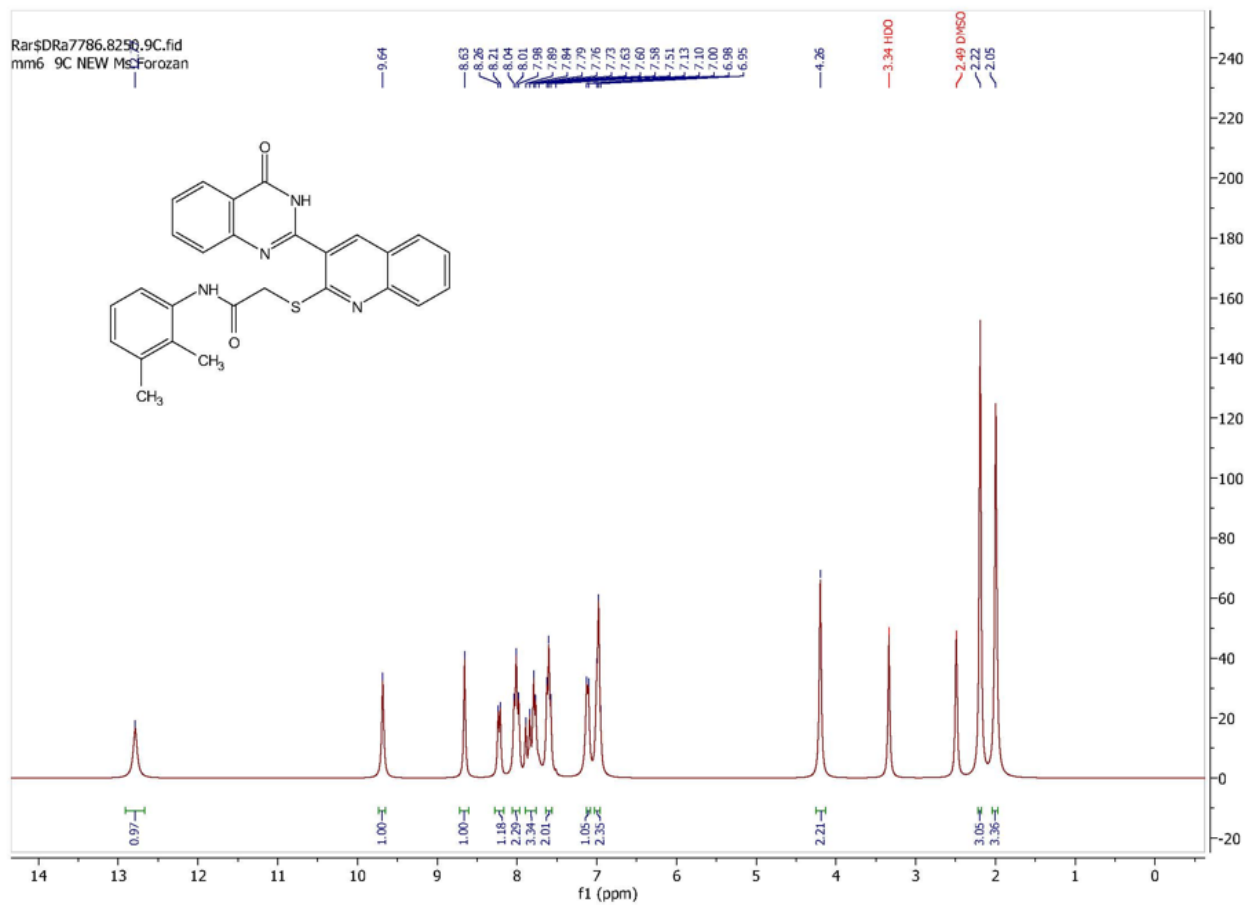

Rar\$DRa7786.8260.9C.fid  
mm6 9C NEW Ms.Forozan

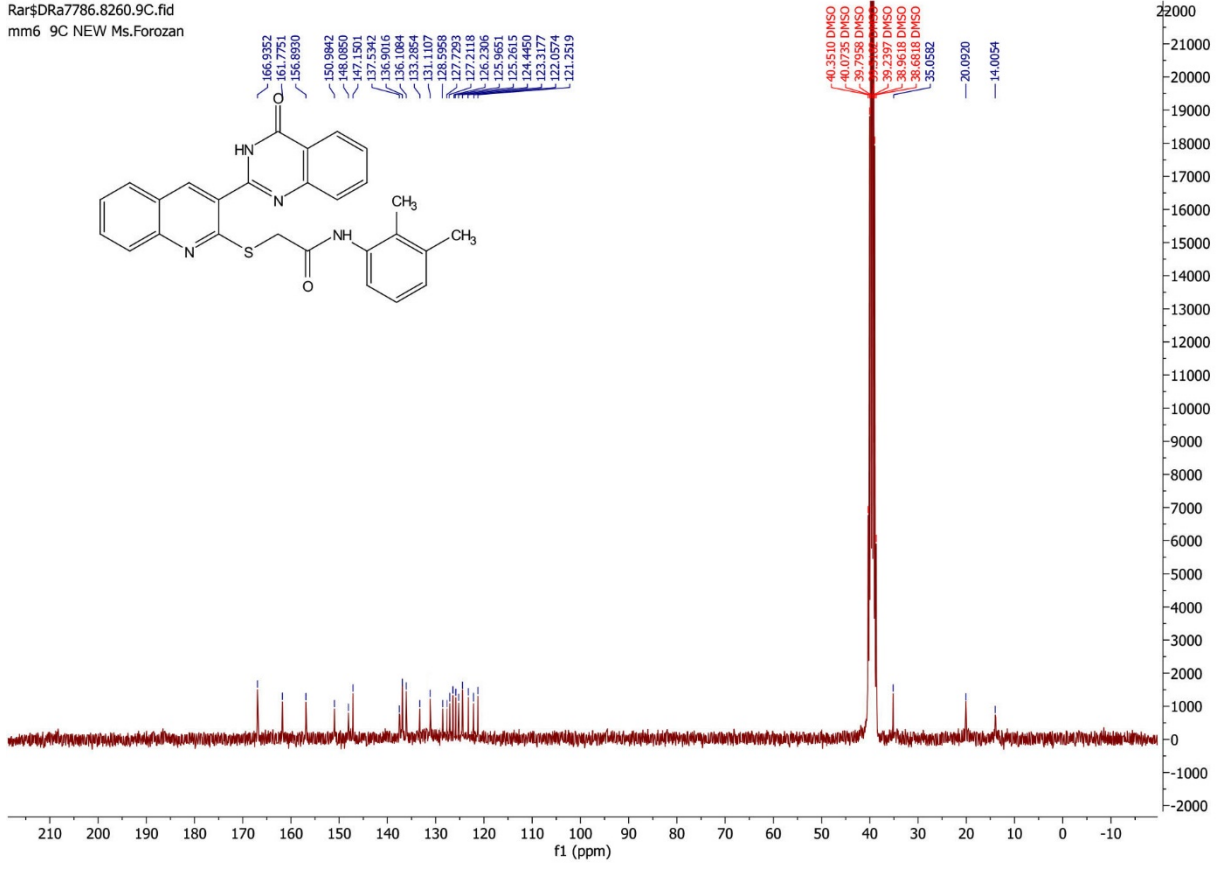



File :C:\MSDCHEM\3\DATA\Snapshot\TEST 2225.D  
Operator :  
Acquired : 28 Jul 2007 4:43 using AcqMethod test000414.M  
Instrument : MSD  
Sample Name: 607  
Misc Info :  
Vial Number: 1

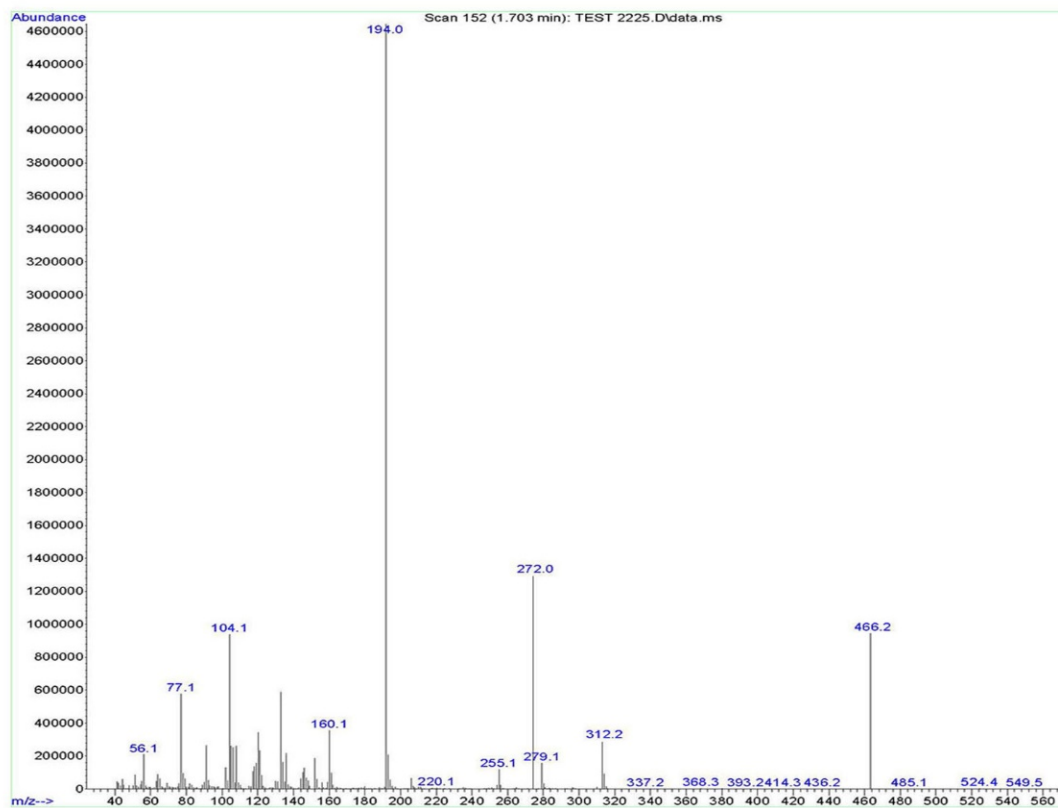

*N*-(2,6-Dimethylphenyl)-2- $\{[3-(4\text{-oxo-3,4-dihydroquinazolin-2-yl})\text{quinolin-2-yl}]\text{thio}\}$ acetamide  
(9d)

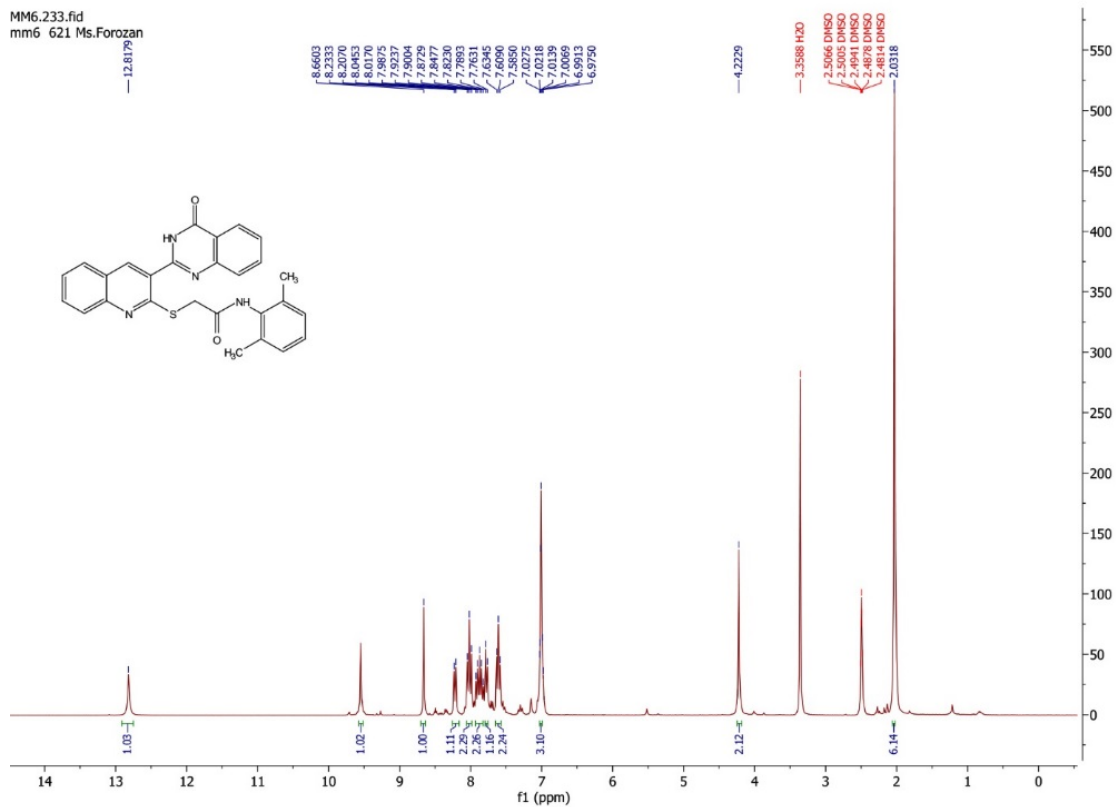

Rar\$DRa8232.19049.234.fid  
mm6 621 Ms.Forozan

166.3812  
161.7658  
156.6572  
151.0140  
148.1433  
147.1732  
137.5297  
135.2871  
134.8103  
131.5032  
128.6995  
127.9595  
127.4424  
125.9518  
124.4637  
121.2376

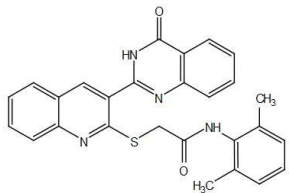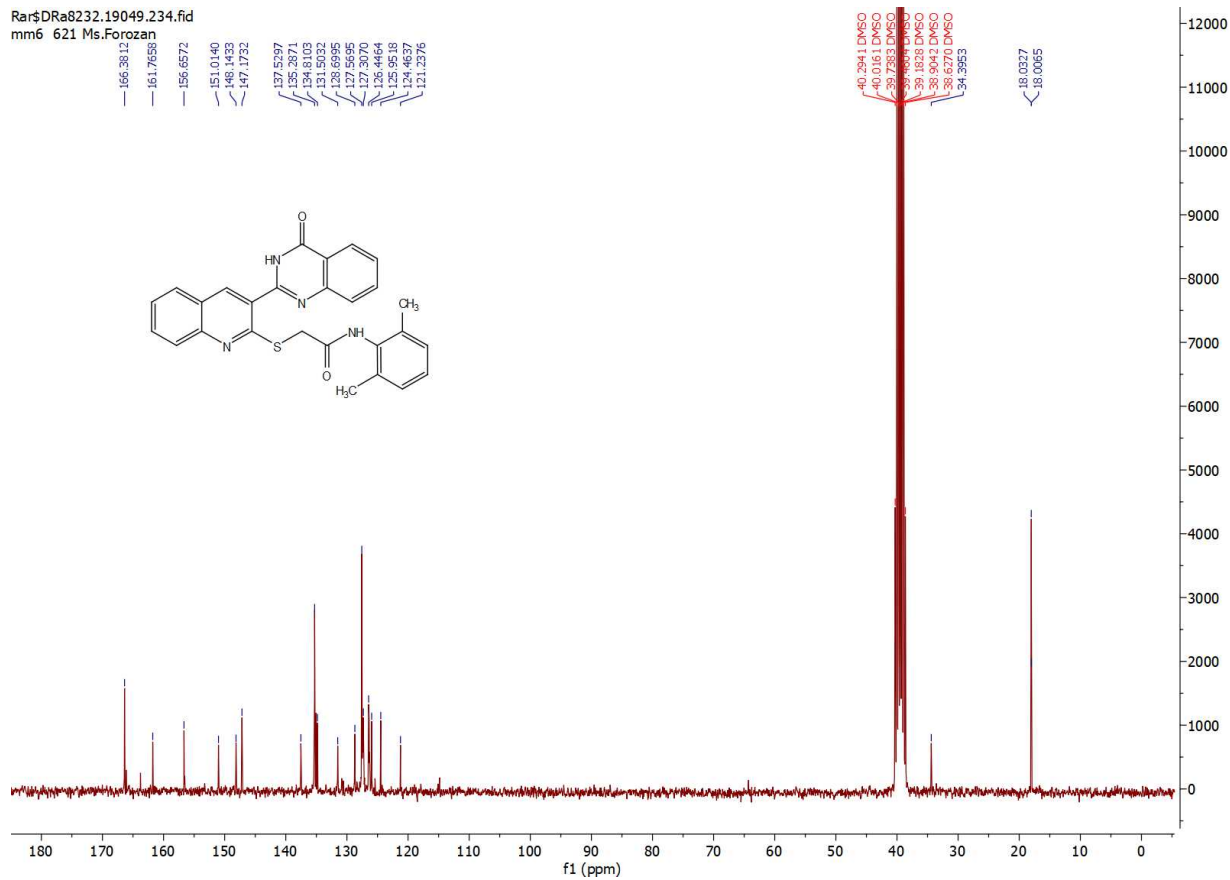

File : C:\MSDCHEM\3\DATA\Snapshot\TEST 2225.D  
Operator :  
Acquired : 28 Jul 2007 4:43 using AcqMethod test000414.M  
Instrument : MSD  
Sample Name: MM621  
Misc Info :  
Vial Number: 1

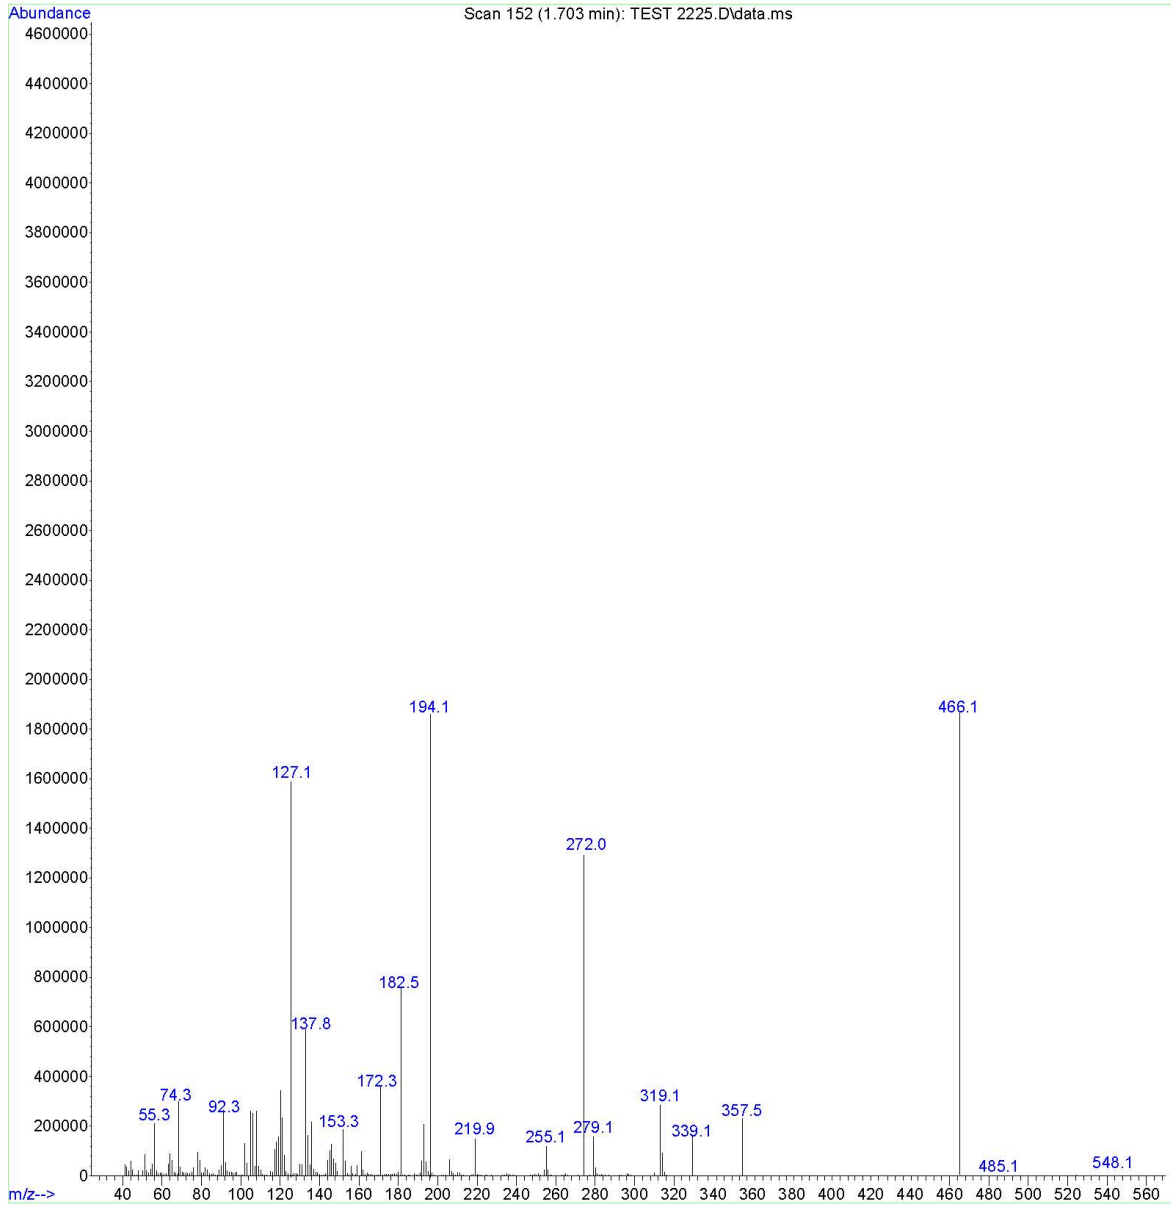

*N*-(4-Ethylphenyl)-2- $\{$ 3-(4-oxo-3,4-dihydroquinazolin-2-yl)quinolin-2-yl $\}$ thioacetamide (**9e**)

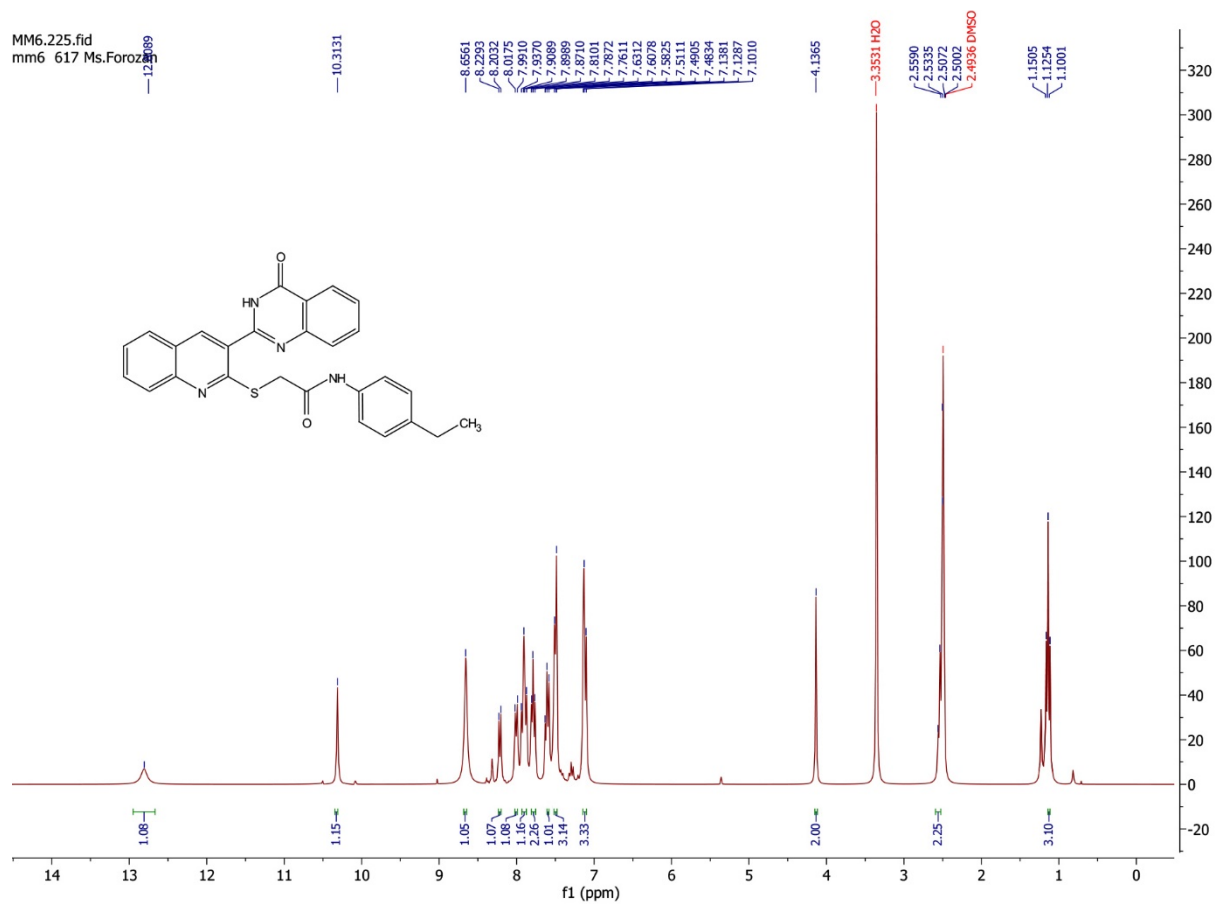

MM6.226.fid  
mm6 617 Ms.Forozan

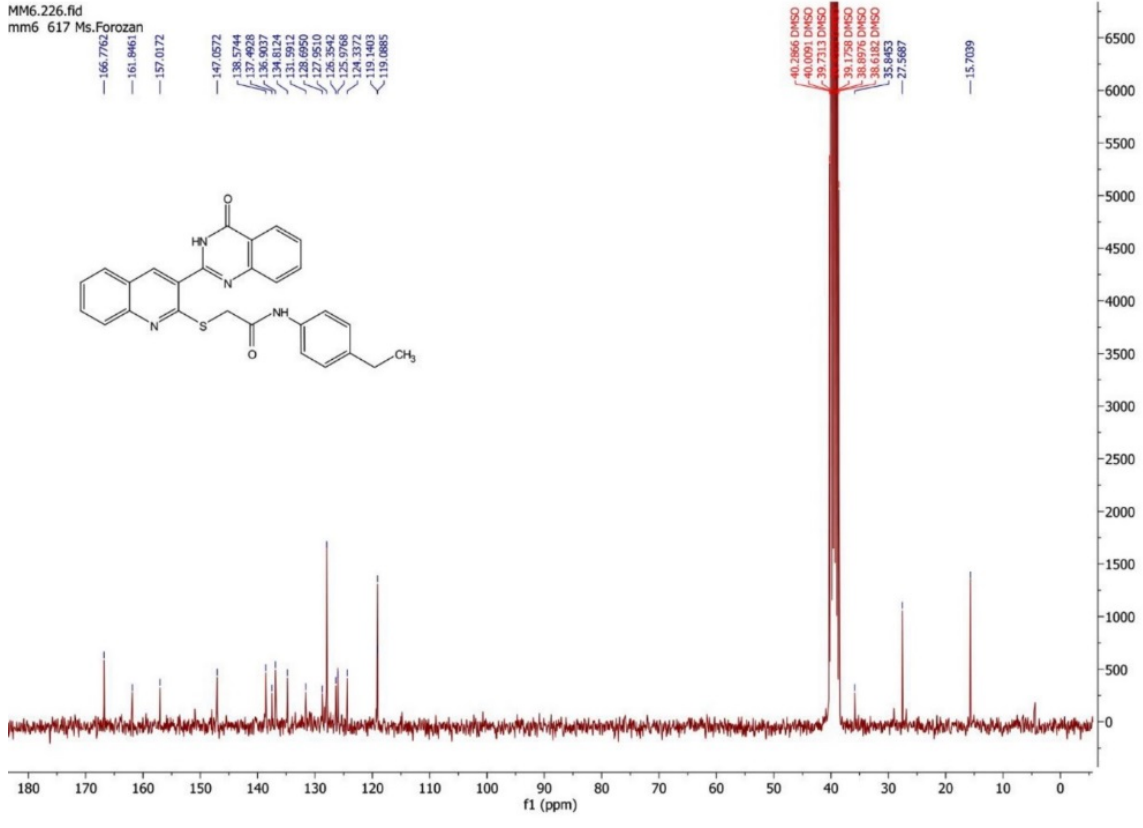

File :C:\MSDCHEM\3\DATA\Snapshot\TEST 2080.D  
Operator :  
Acquired : 22 Jul 2007 1:46 using AcqMethod test000414.M  
Instrument : MSD  
Sample Name: MM6 617  
Misc Info :  
Vial Number: 1

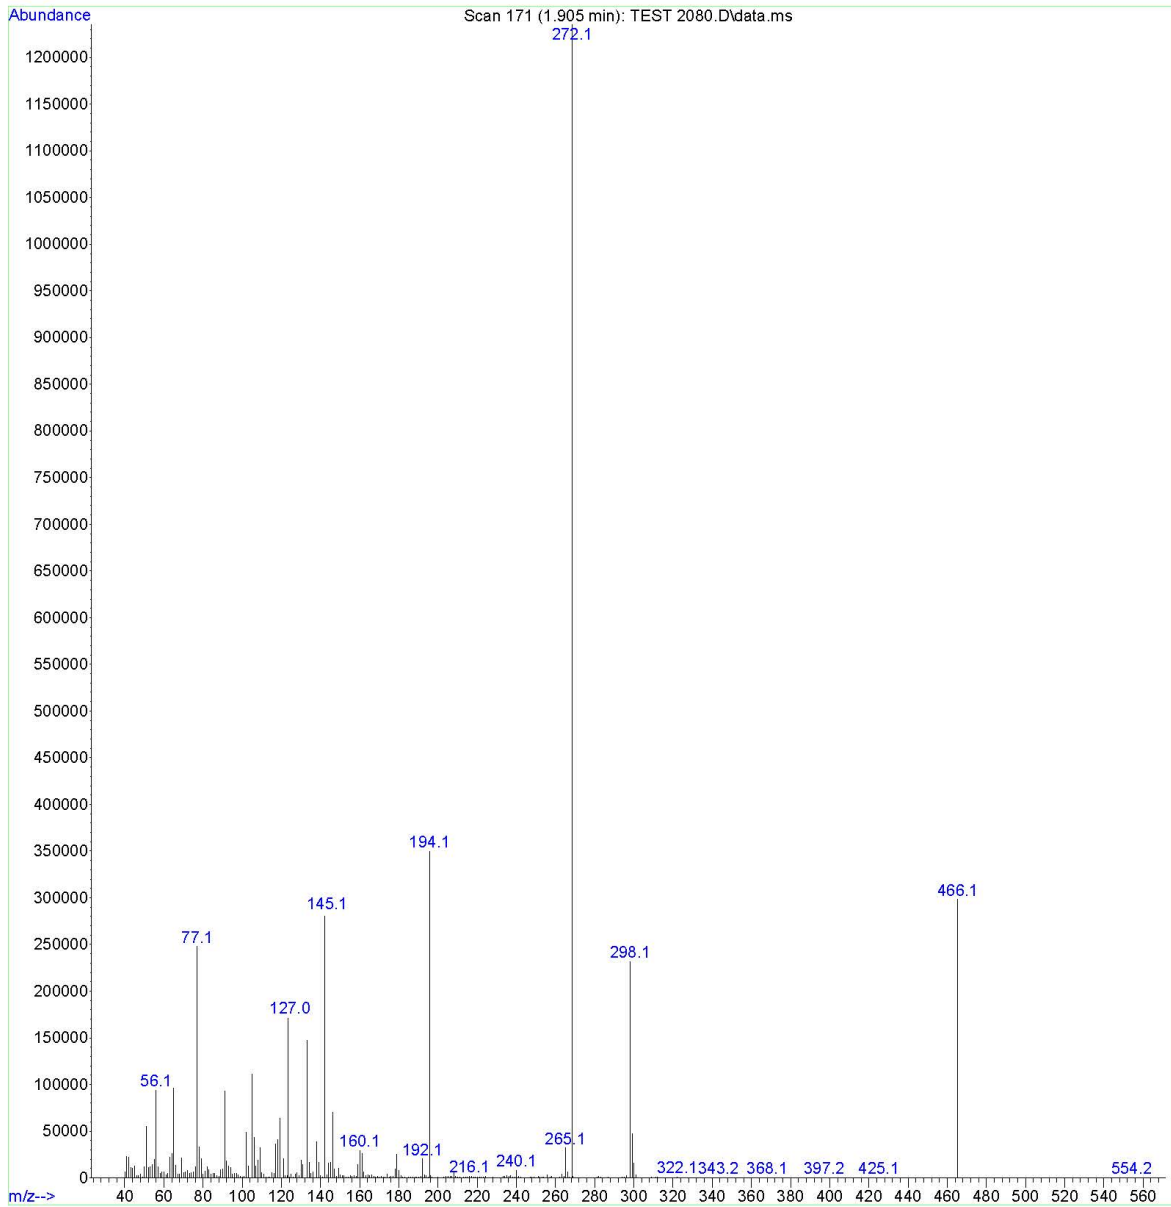

*N*-(4-Methoxyphenyl)-2- $\{[3-(4\text{-oxo-3,4-dihydroquinazolin-2-yl})\text{quinolin-2-yl}]\text{thio}\}$ acetamide (**9f**)

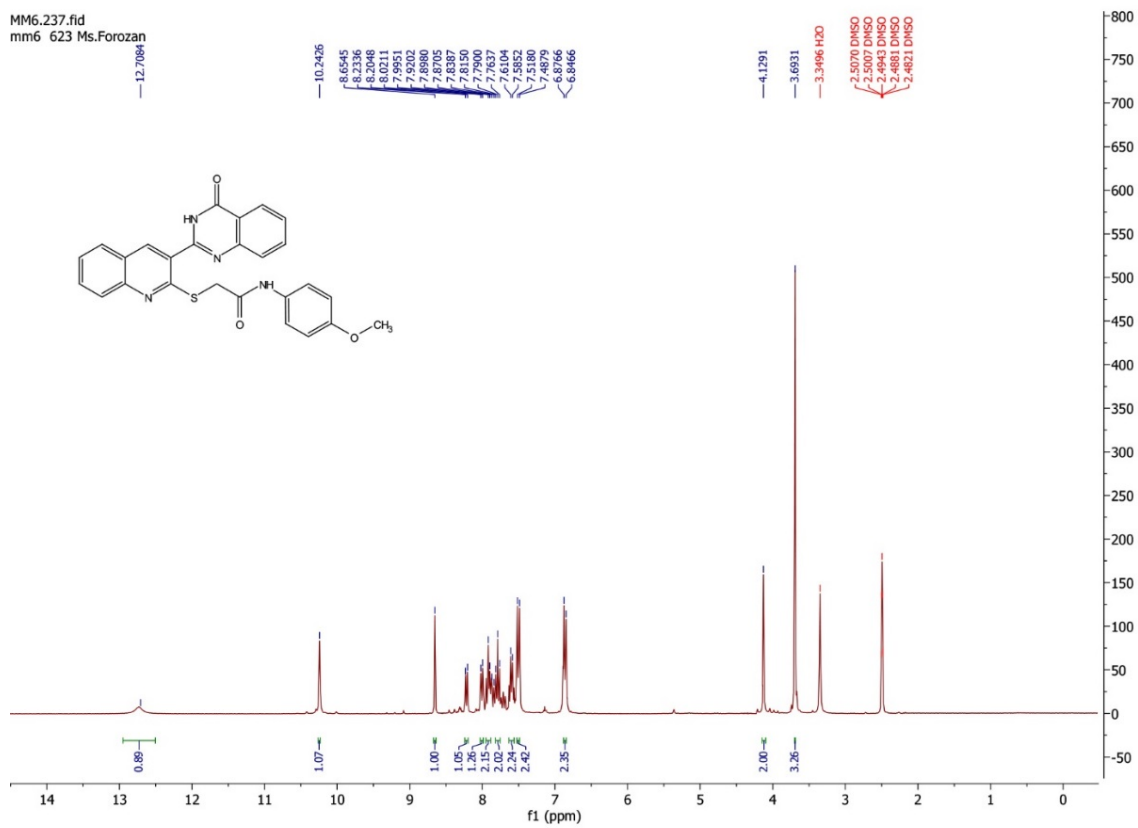



MM6.238.fid  
mm6 623 Ms.Forozan

- 166.4657
- 163.7396
- 157.0220
- 155.1494
- 149.0716
- 137.4637
- 134.8121
- 131.5835
- 129.6522
- 127.3266
- 126.3469
- 126.0198
- 124.3431
- 123.4425
- 120.5466
- 113.8518

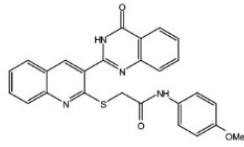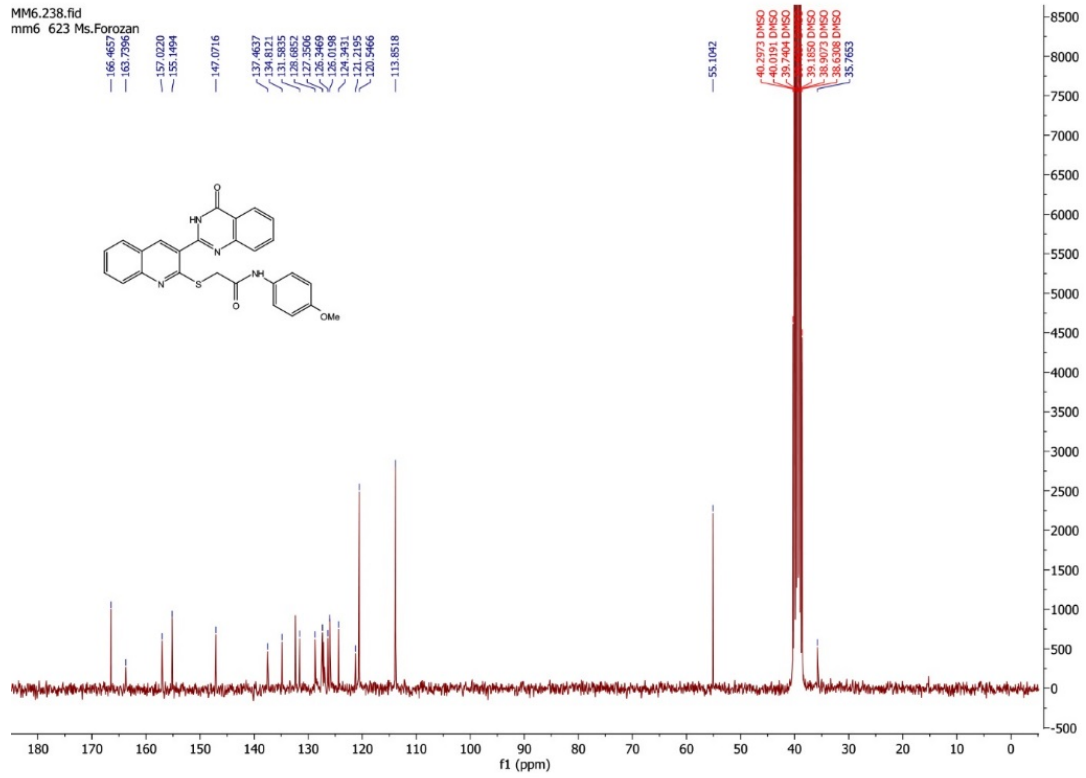

File :C:\MSDCHEM\3\DATA\Snapshot\TEST 2080.D  
Operator :  
Acquired : 22 Jul 2007 1:46 using AcqMethod test000414.M  
Instrument : MSD  
Sample Name: MM6 623  
Misc Info :  
Vial Number: 1

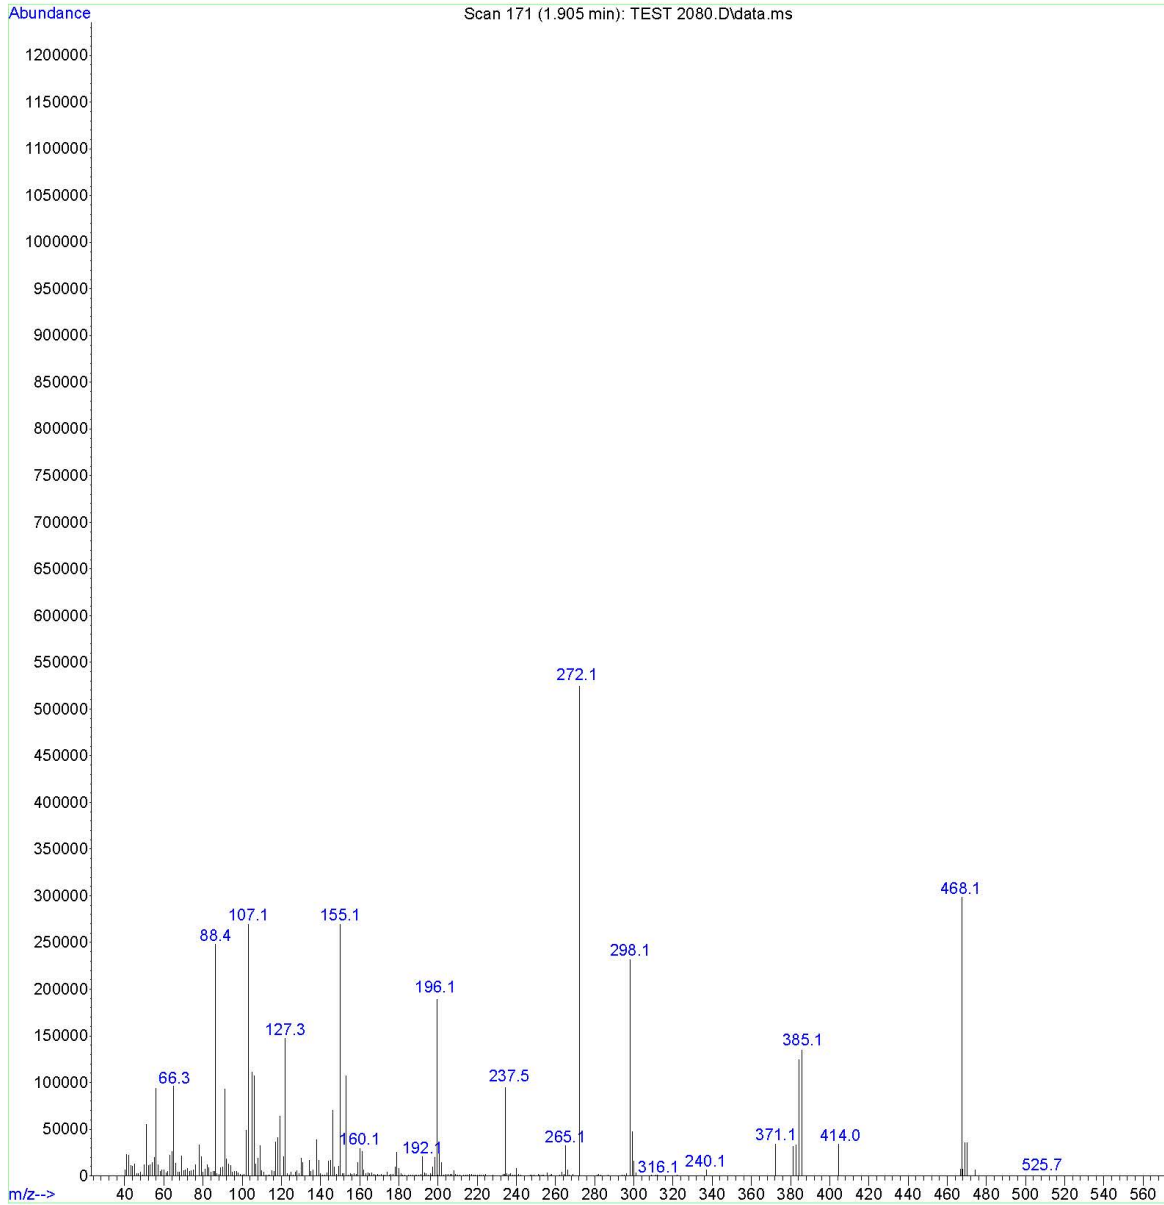

*N*-(4-Hydroxyphenyl)-2-{[3-(4-oxo-3,4-dihydroquinazolin-2-yl)quinolin-2-yl]thio}acetamide

(9g)

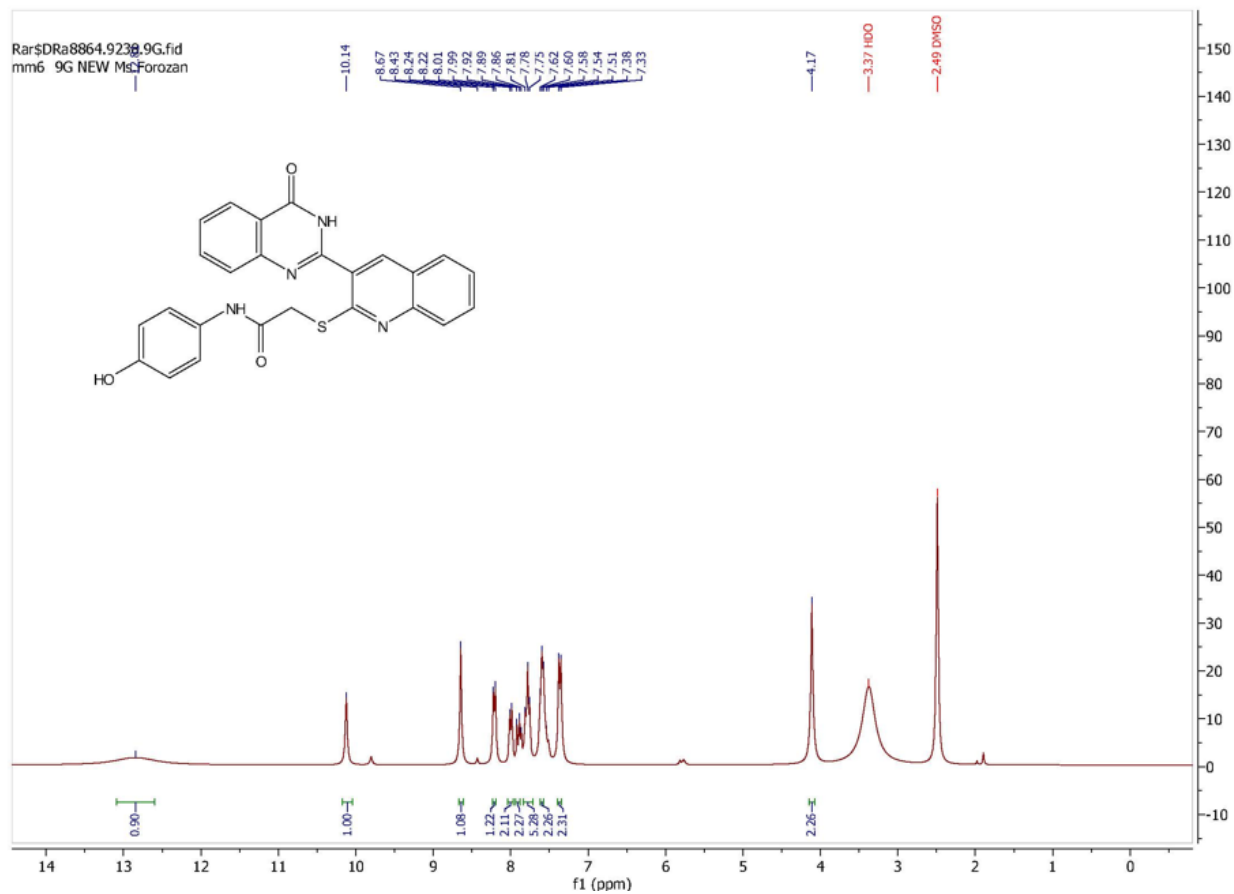

Rar\$DRa8864.9231.9G.fid  
mm6 9G NEW Ms.Forozan

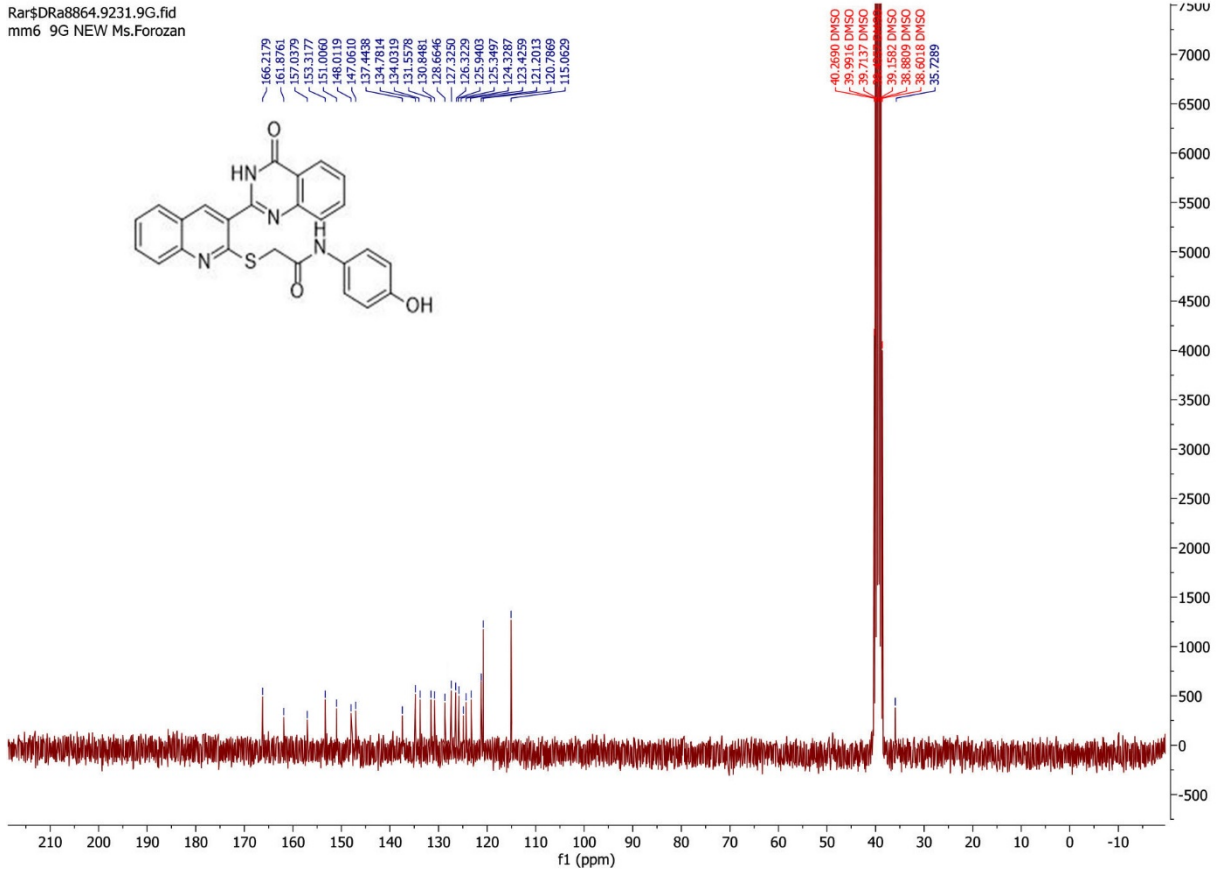

File :C:\MSDCHEM\3\DATA\Snapshot\TEST 2080.D  
Operator :  
Acquired : 22 Jul 2007 2:46 using AcqMethod test000414.M  
Instrument : MSD  
Sample Name: MM6 613  
Misc Info :  
Vial Number: 1

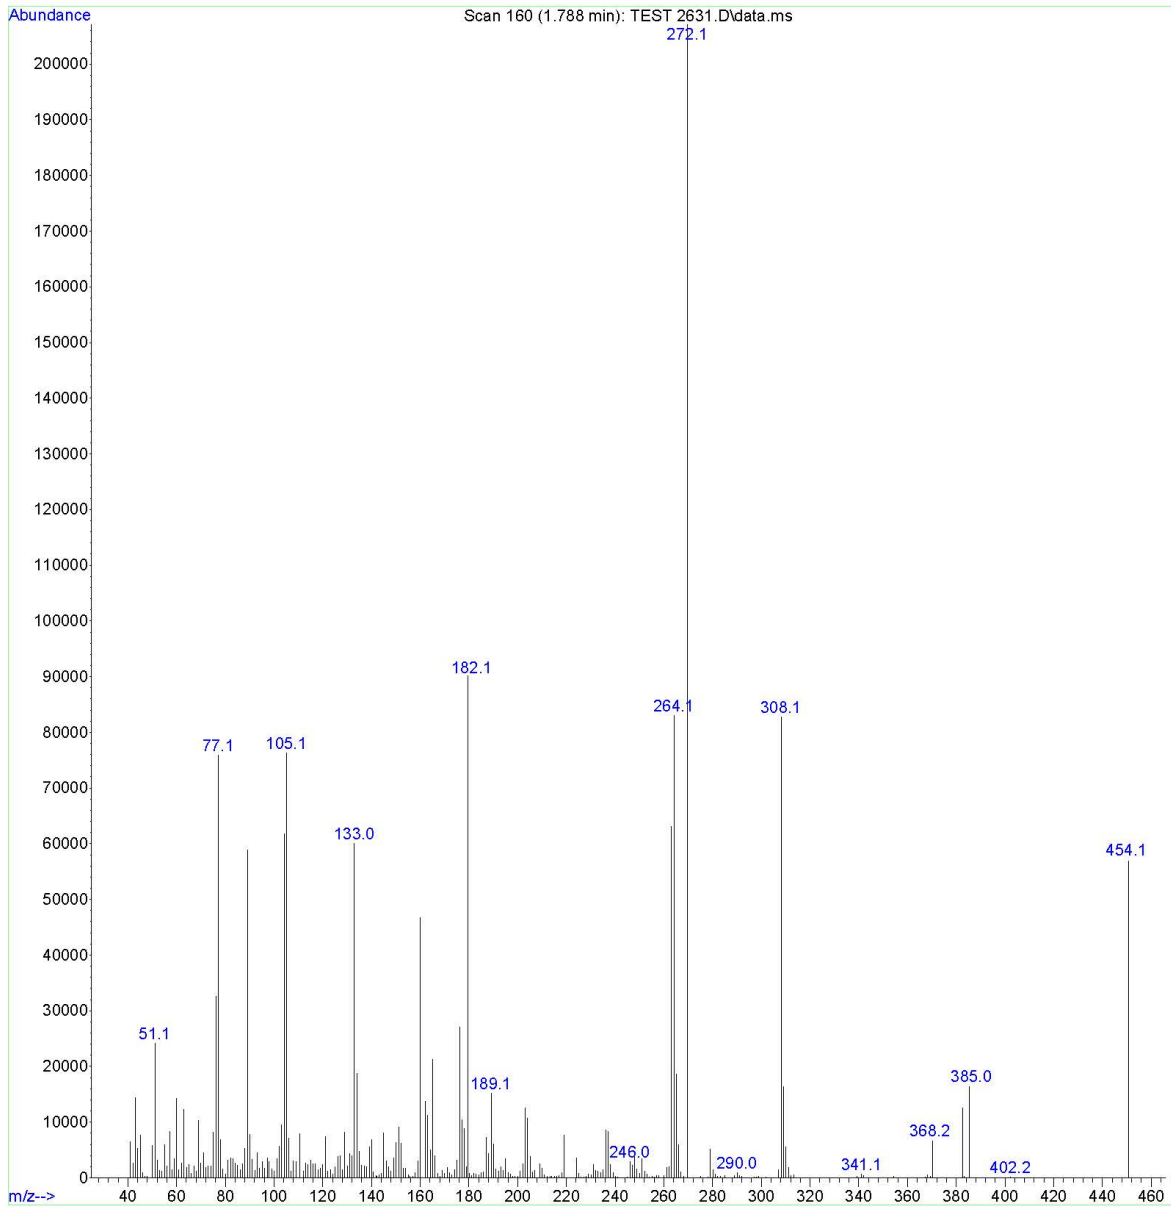

*N*-(2-Fluorophenyl)-2- $\{[3-(4\text{-oxo-3,4-dihydroquinazolin-2-yl})\text{quinolin-2-yl}]\text{thio}\}$ acetamide (**9h**)

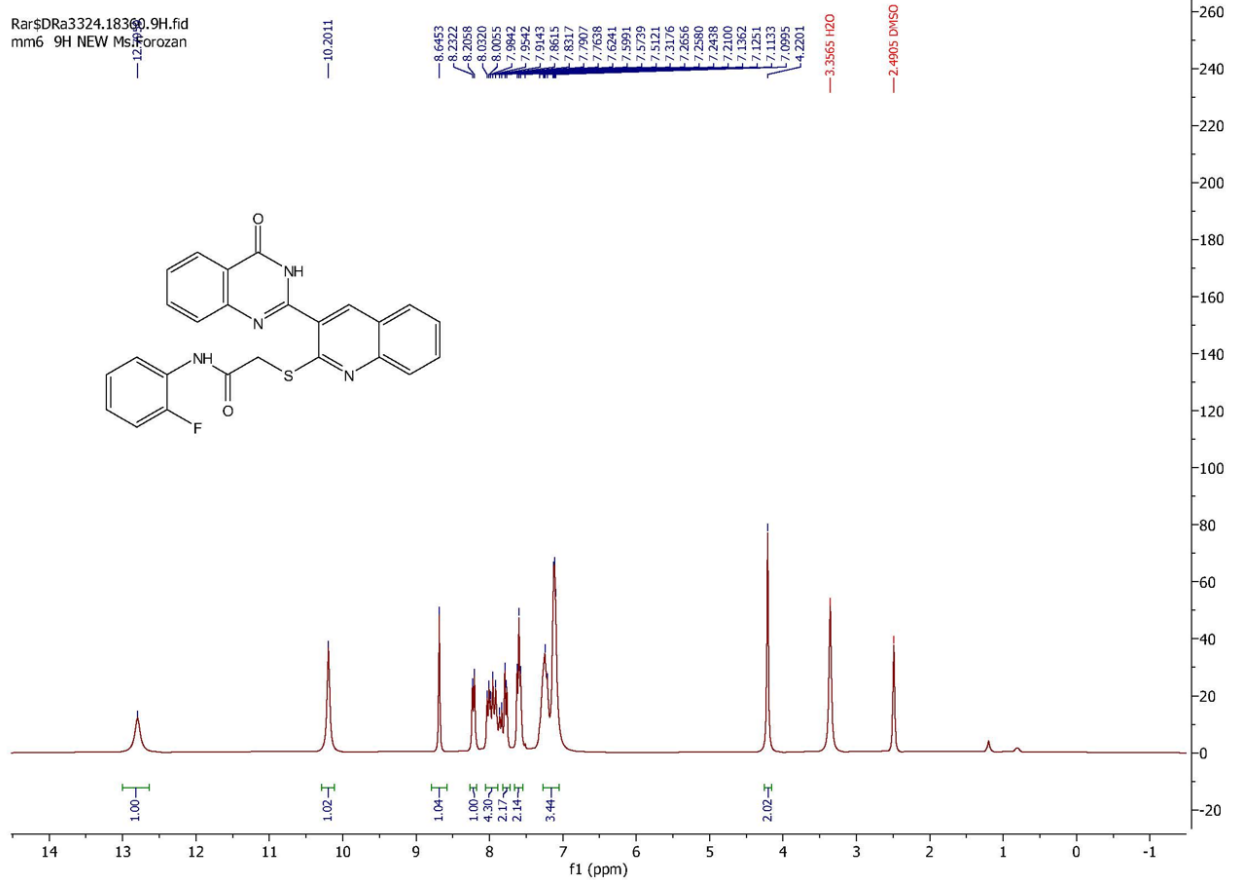

Rar\$DRa88621.18526.9H.fid  
mm6 9H NEW Ms.Forozan

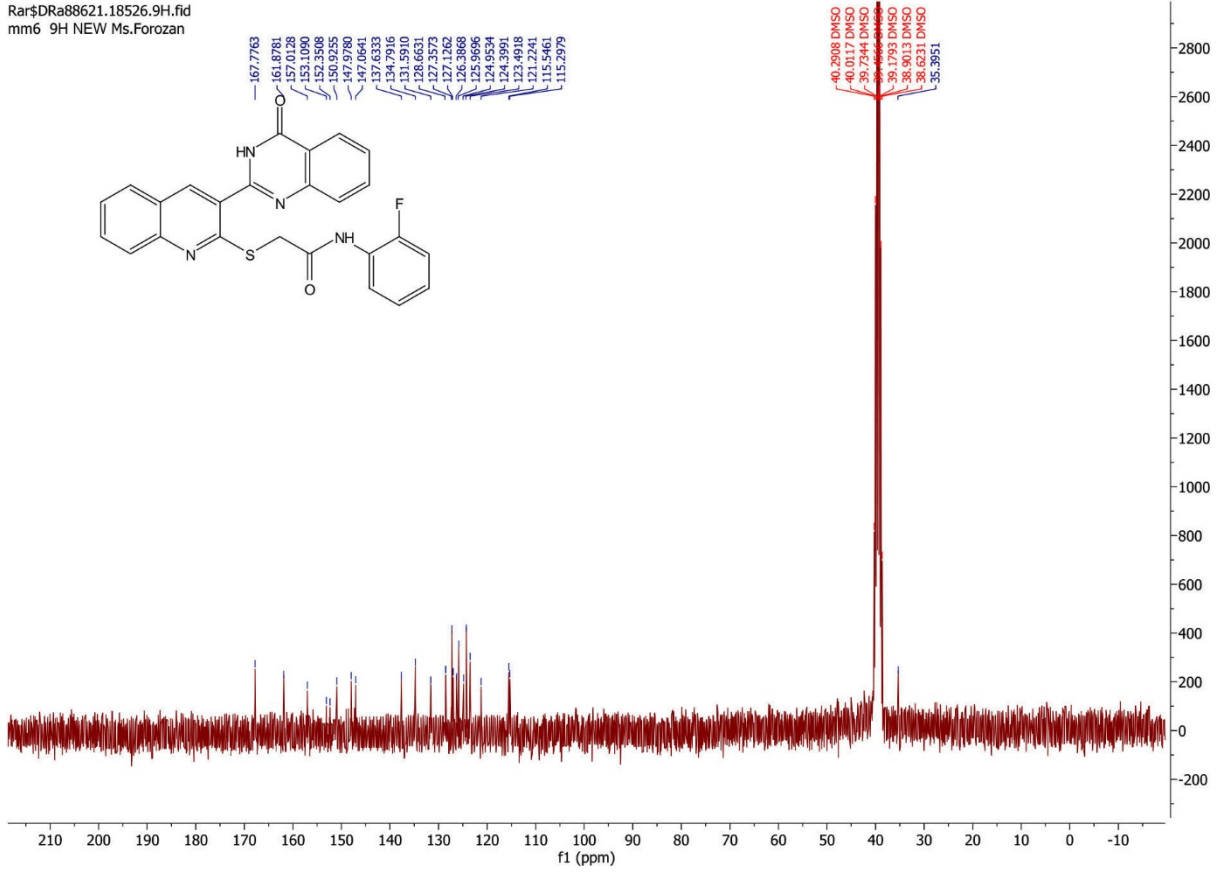

File : C:\MSDCHEM\3\DATA\Snapshot\NO SAMPLE09.D  
Operator :  
Acquired : 3 Jan 2007 21:03 using AcqMethod f1.M  
Instrument : MSD  
Sample Name: MM6 612  
Misc Info :  
Vial Number: 1

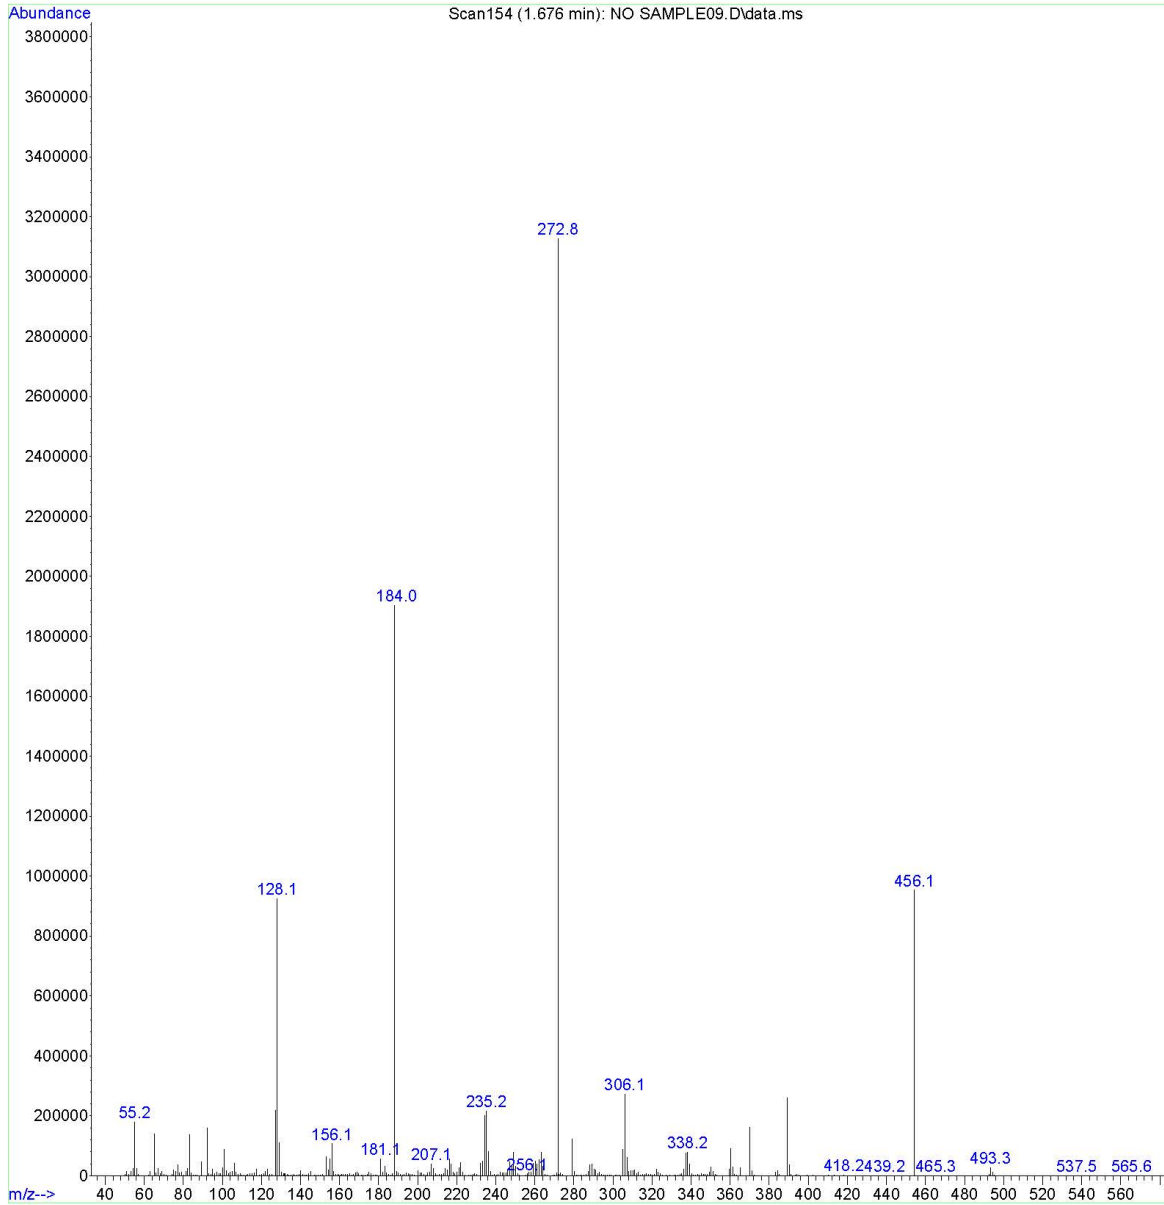



*N*-(4-Fluorophenyl)-2- $\{[3$ -(4-oxo-3,4-dihydroquinazolin-2-yl)quinolin-2-yl]thio $\}$ acetamide (**9i**)

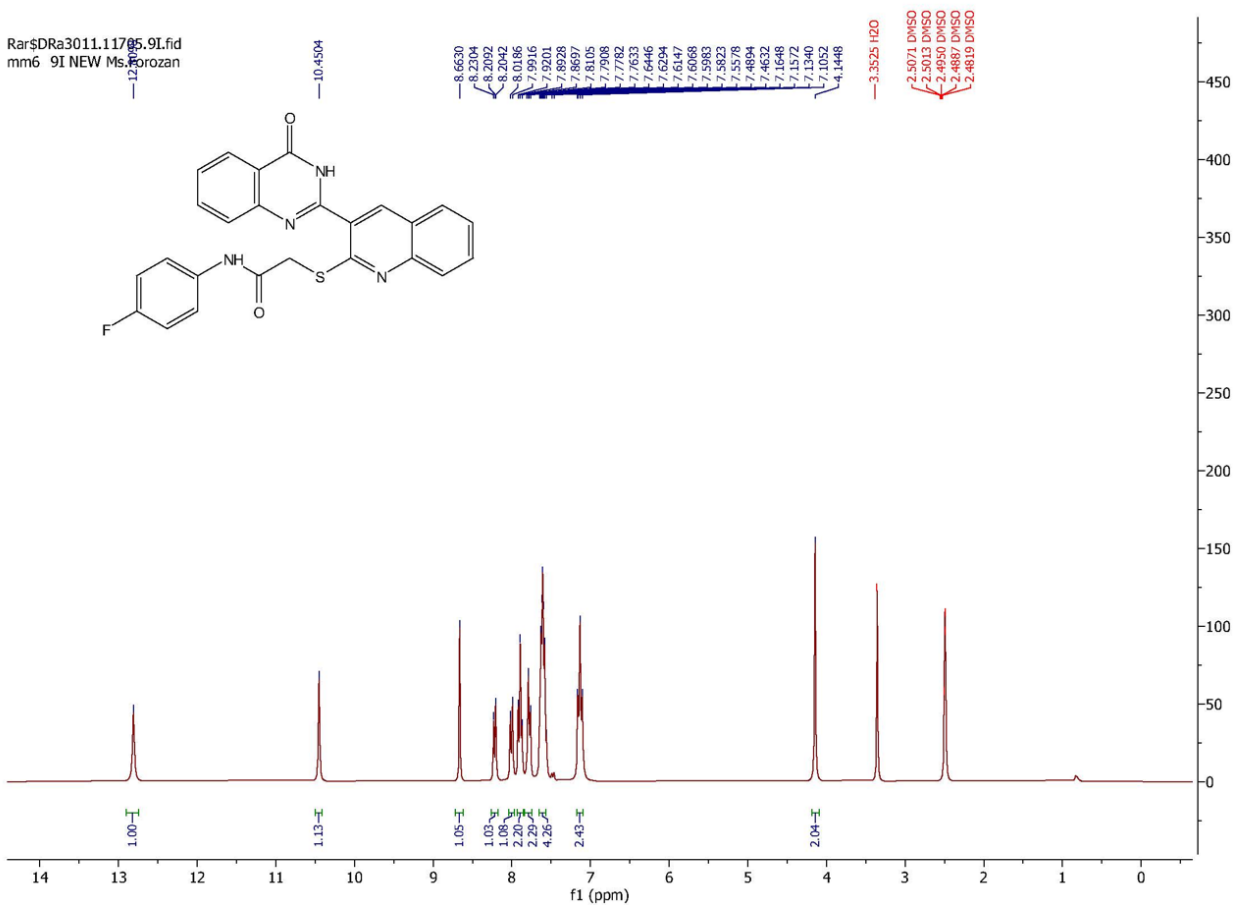

Rar\$DRa87526.14528.9l.fid  
mm6 9l NEW Ms.Forozan

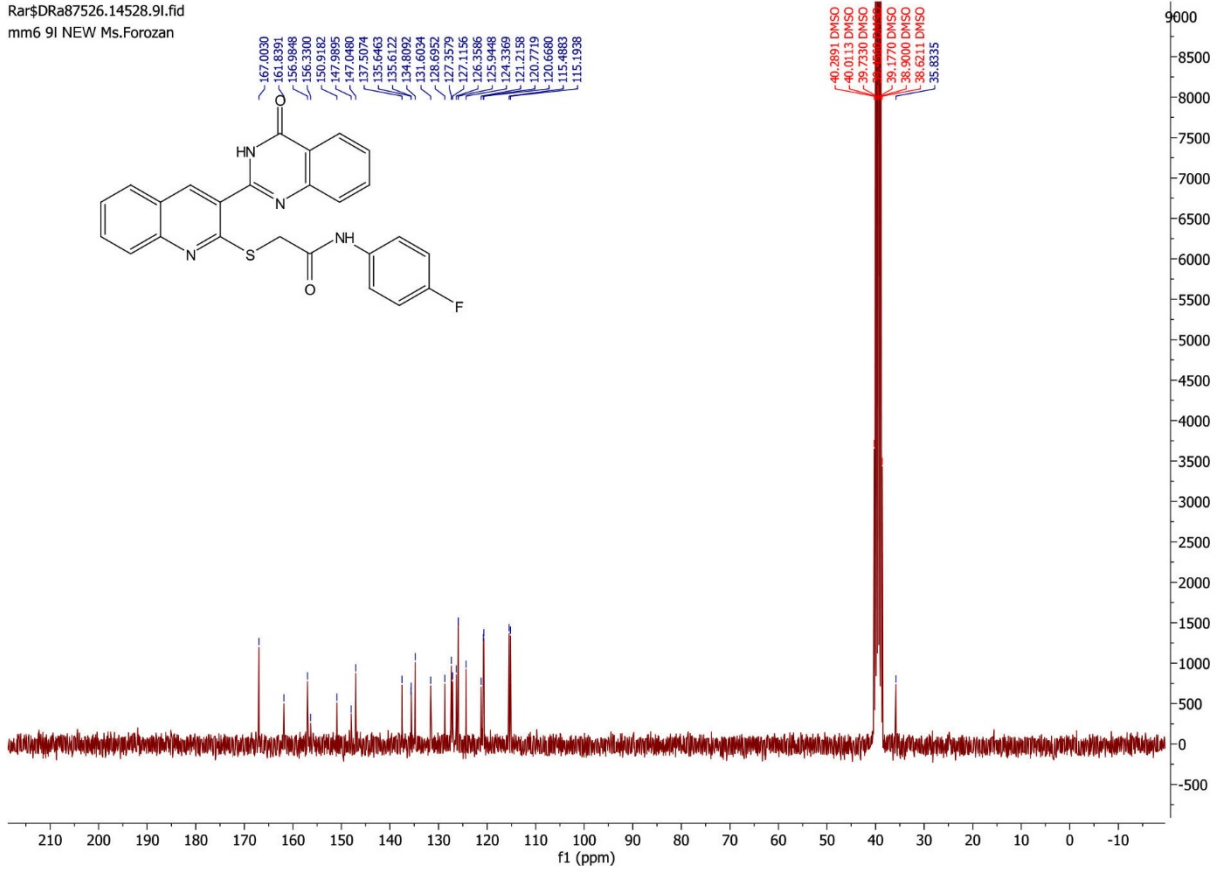

File : C:\MSDCHEM\3\DATA\Snapshot\NO SAMPLE08.D  
Operator :  
Acquired : 3 Jan 2007 20:41 using AcqMethod f1.M  
Instrument : MSD  
Sample Name: MM6 618  
Misc Info :  
Vial Number: 1

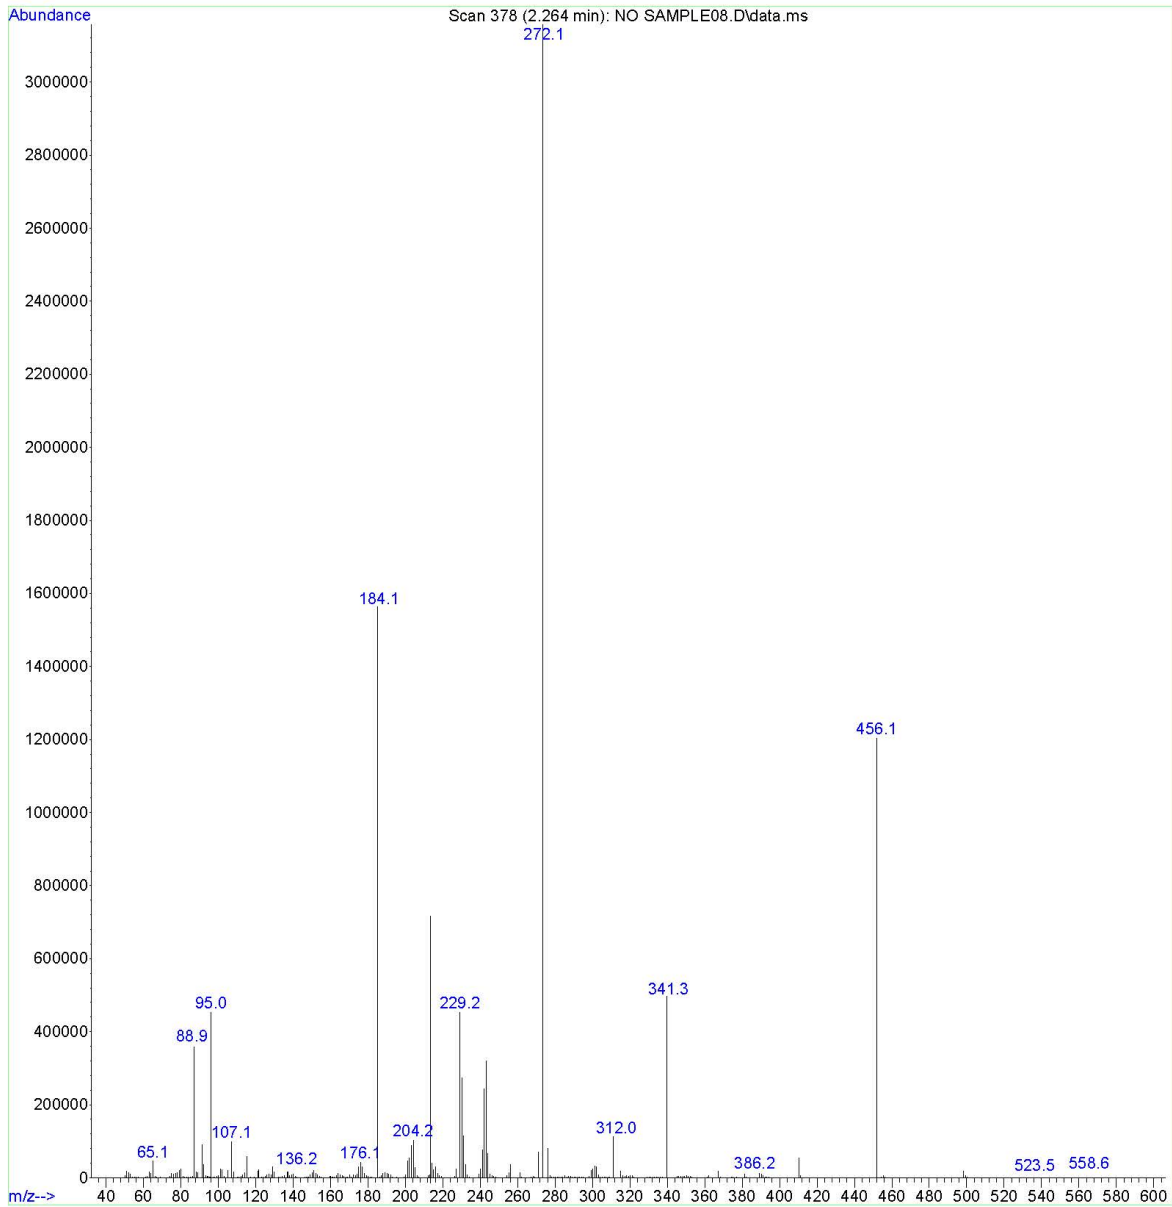

*N*-(3-Chlorophenyl)-2- $\{[3-(4\text{-oxo-3,4-dihydroquinazolin-2-yl})\text{quinolin-2-yl}]\text{thio}\}$ acetamide (**9j**)

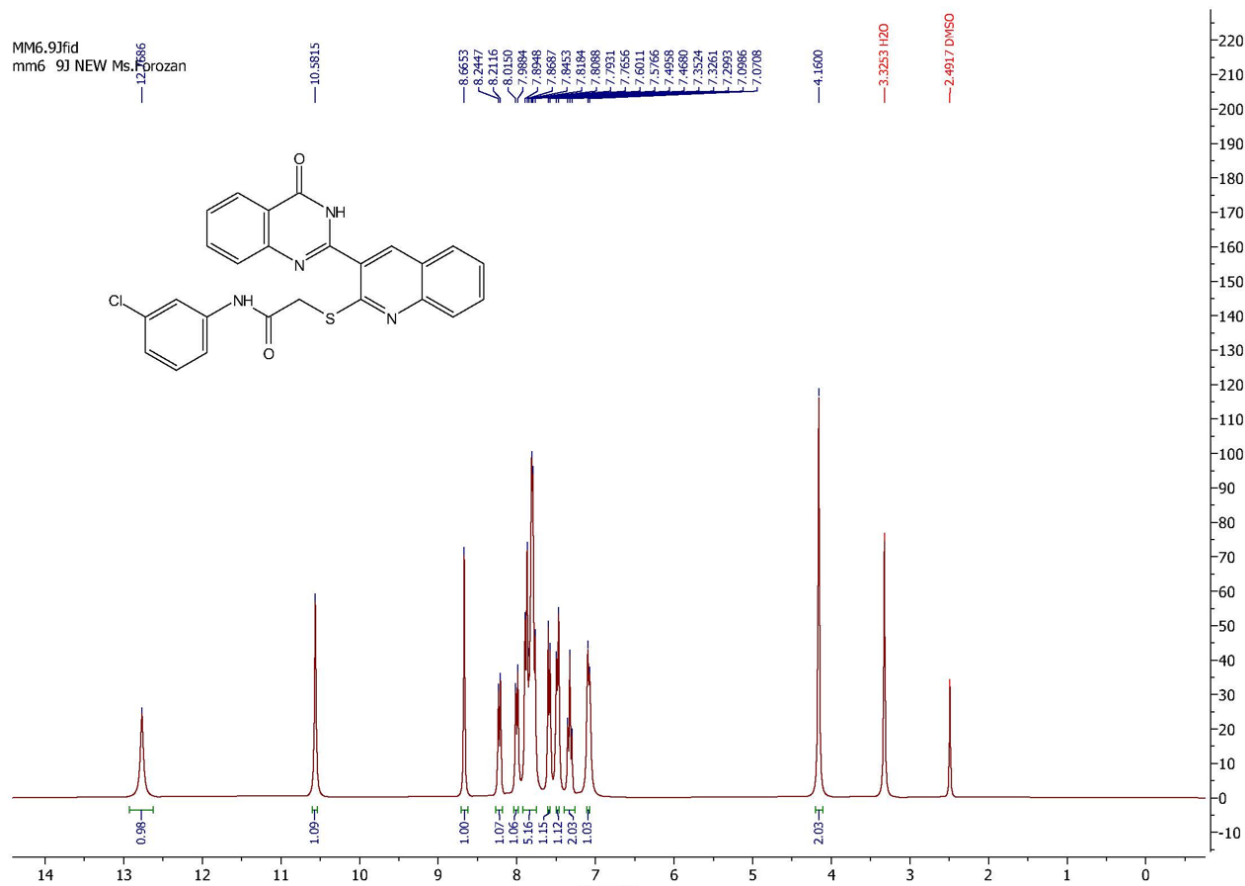

Rar\$DRa7781.7978.9J.fid  
mm6 9J NEW Ms.Forozan

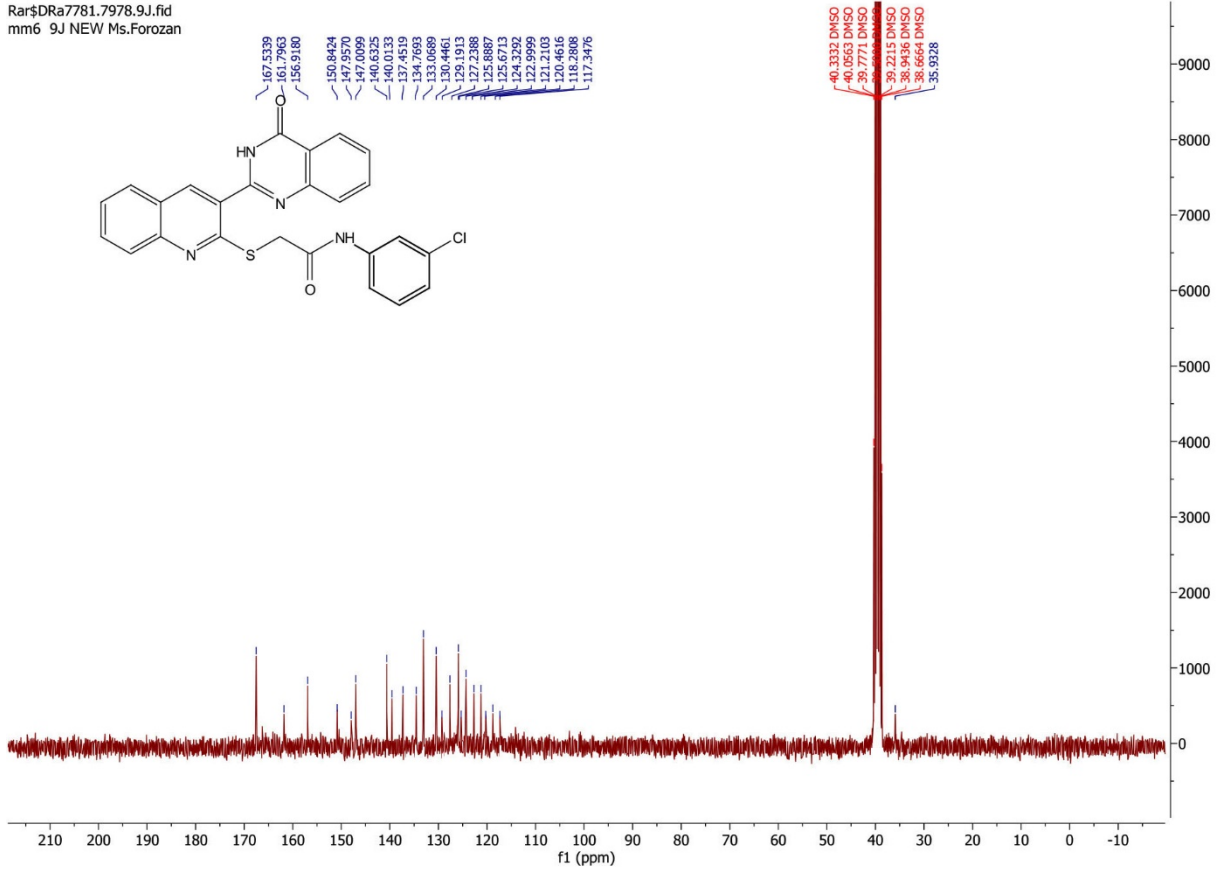

File :C:\MSDCHEM\3\DATA\Snapshot\NO SAMPLE08.D  
Operator :  
Acquired : 3 Jan 2007 20:41 using AcqMethod f1.M  
Instrument : MSD  
Sample Name: MM6 606  
Misc Info :  
Vial Number: 1

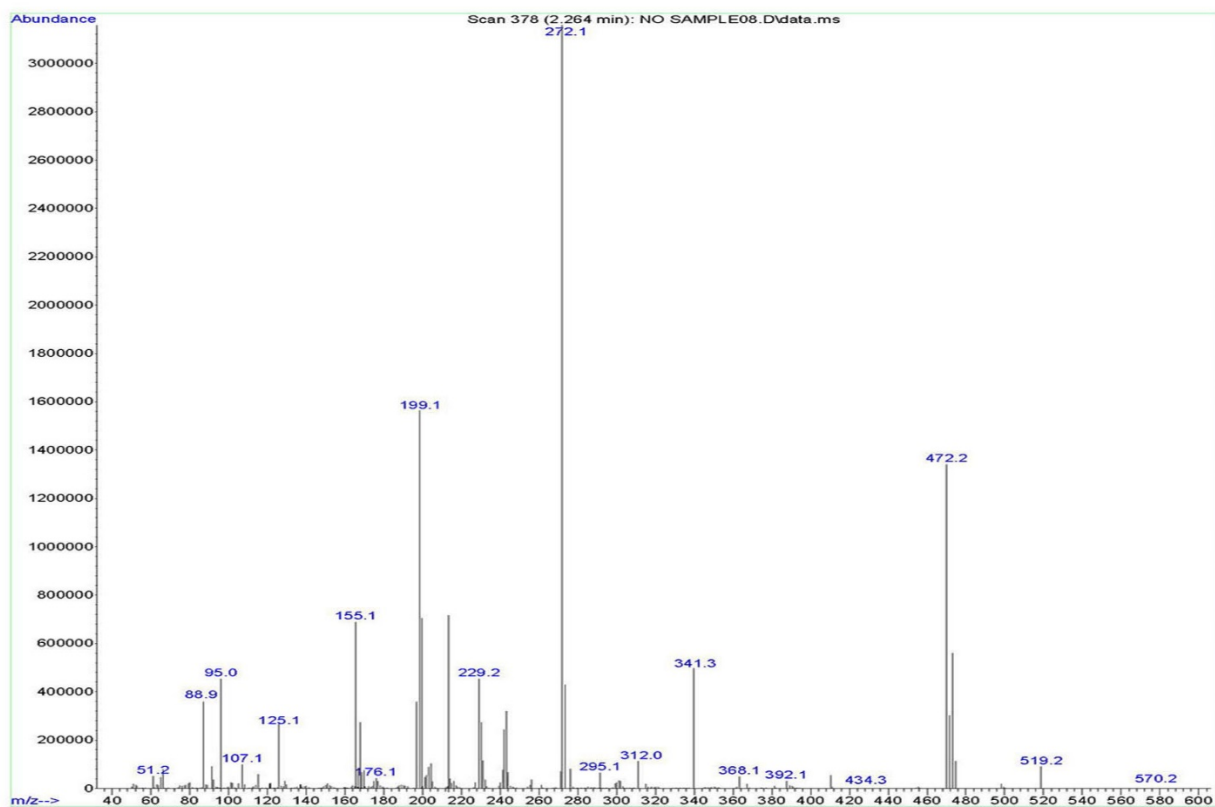

*N*-(4-Chlorophenyl)-2- $\{[3-(4\text{-oxo-3,4-dihydroquinazolin-2-yl})\text{quinolin-2-yl}] \text{thio}\}$  acetamide  
(9k)

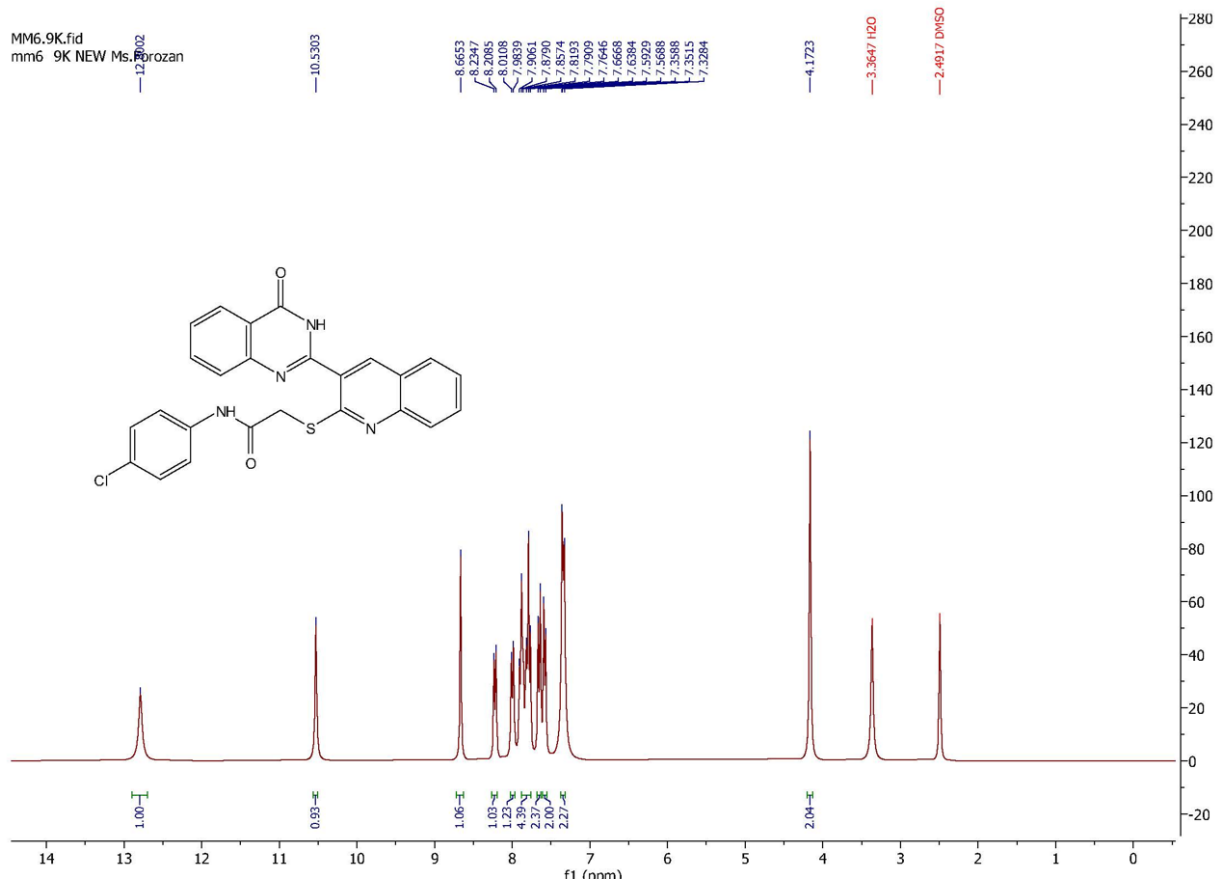

RarşDRa8234.7852.9K.fid  
mm6 9K NEW Ms.Forozan

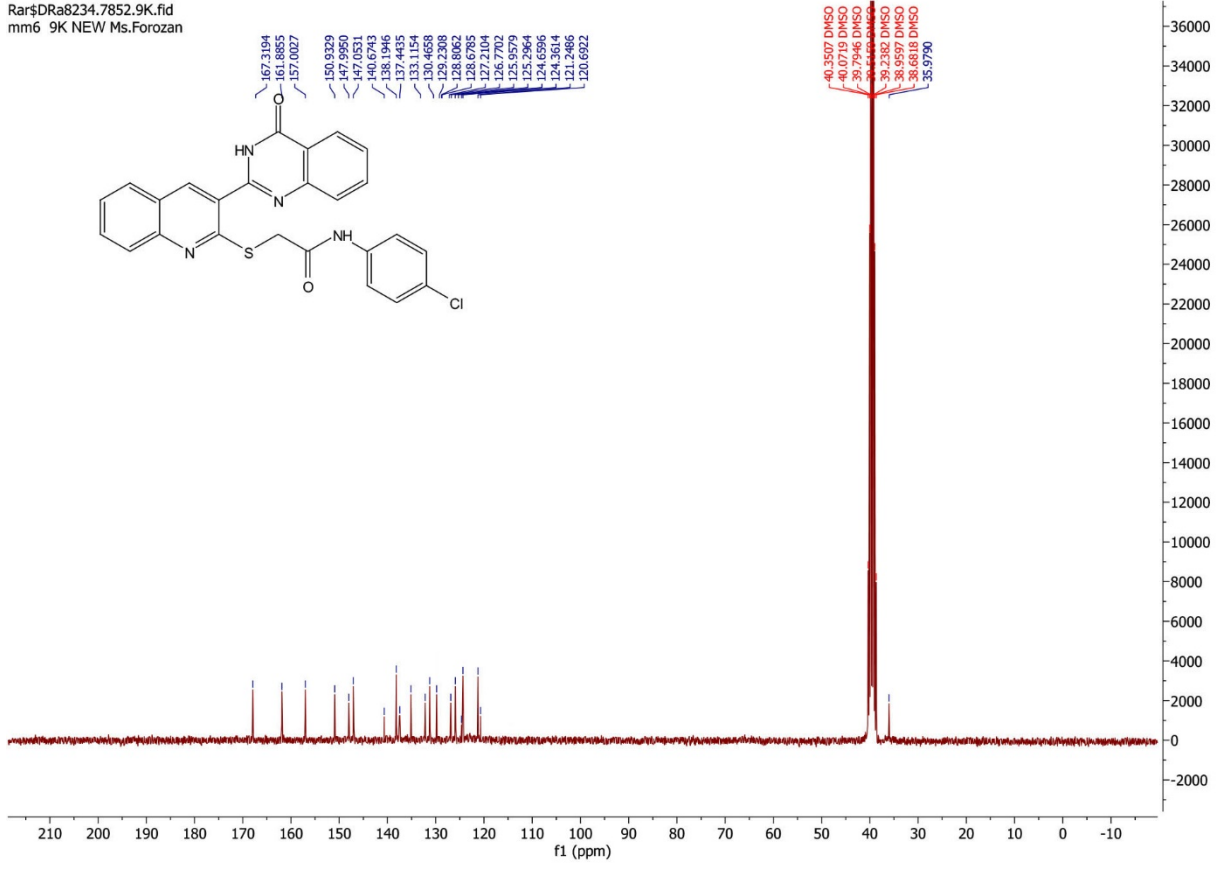



File :C:\MSDCHEM\3\DATA\Snapsho\NO SAMPLE08.D  
Operator :  
Acquired : 3 Jan 2007 20:41 using AcqMethod f1.M  
Instrument : MSD  
Sample Name: MM6 602  
Misc Info :  
Vial Number: 1

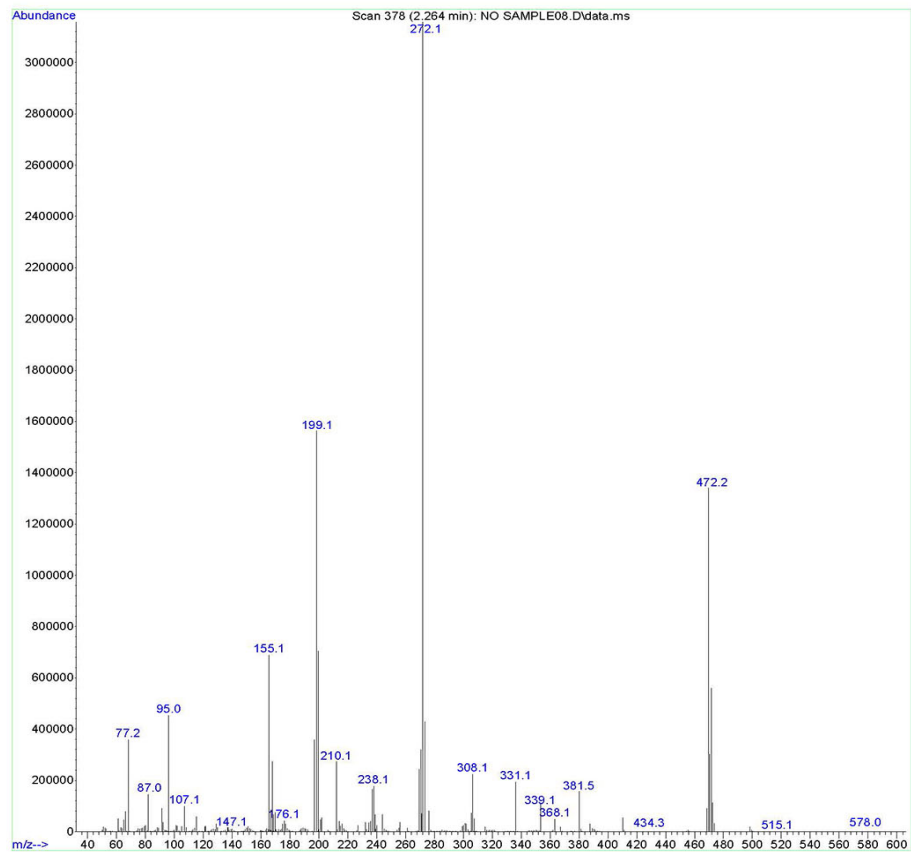

*N*-(4-Bromophenyl)-2- $\{[3-(4\text{-oxo-3,4-dihydroquinazolin-2-yl})\text{quinolin-2-yl}]\text{thio}\}$ acetamide (**91**)

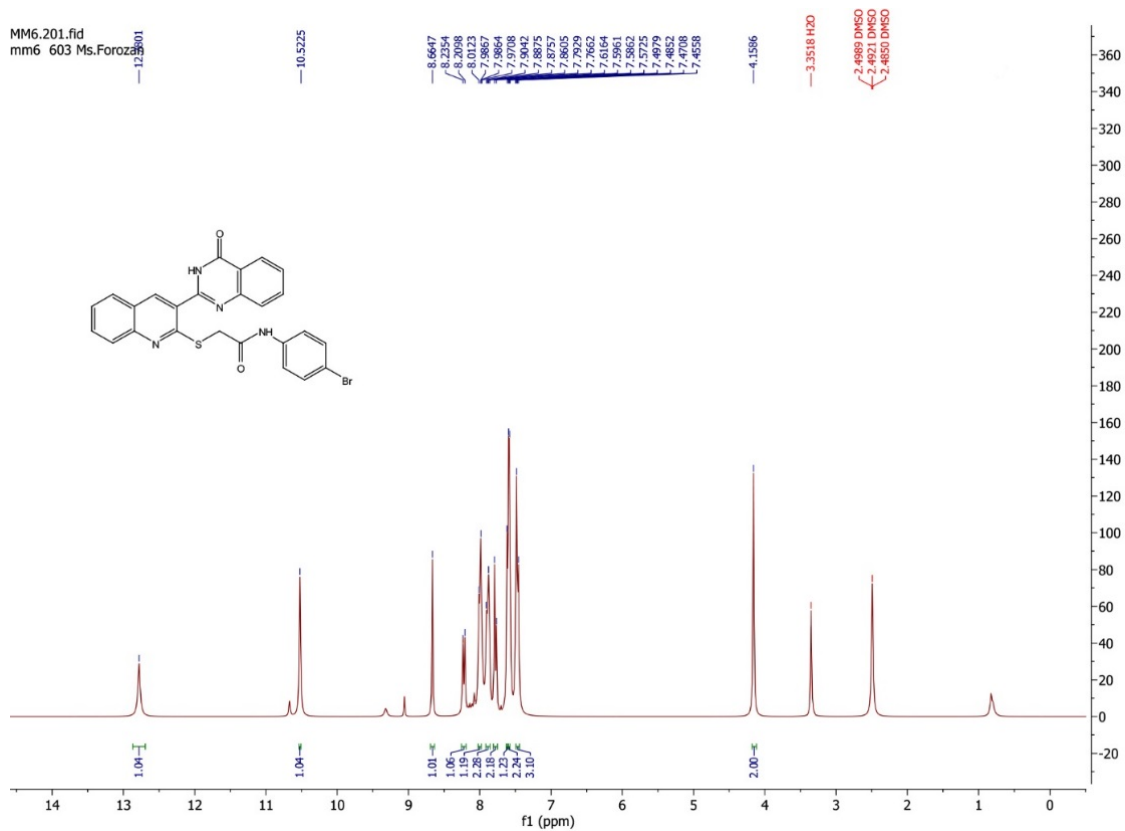

MM6.202.fid  
mm6 603 Ms.Forozan

167.3347  
167.1085  
167.1119  
161.8330  
156.9917  
150.8860  
147.9441  
147.0484  
138.6055  
137.5328  
131.9422  
129.8152  
127.2857  
125.9156  
125.2854  
124.3501  
121.2413  
120.8098  
115.0447  
114.7724

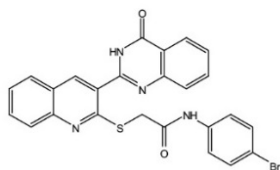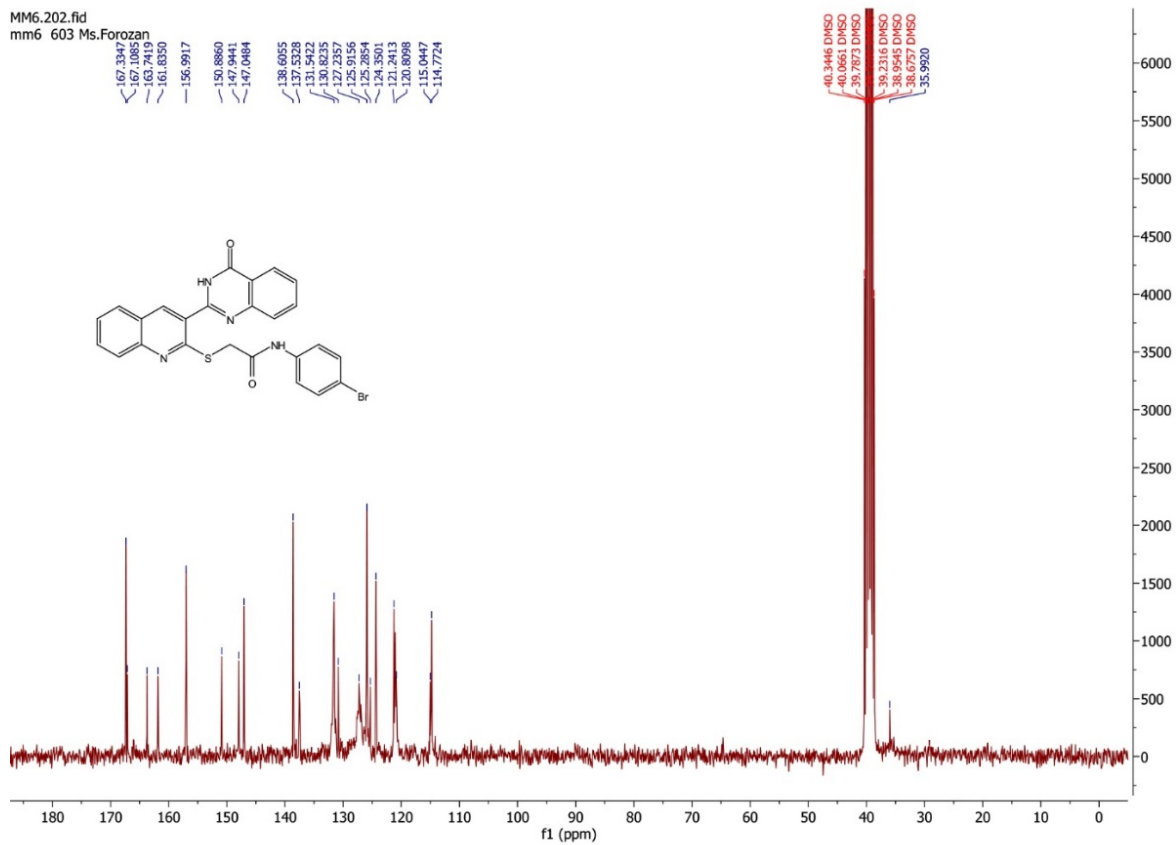

File :C:\MSDCHEM\3\DATA\Snapshot\TEST 2458.D  
Operator :  
Acquired : 6 Aug 2007 13:27 using AcqMethod test000414.M  
Instrument : MSD  
Sample Name: MM6 603  
Misc Info :  
Vial Number: 1

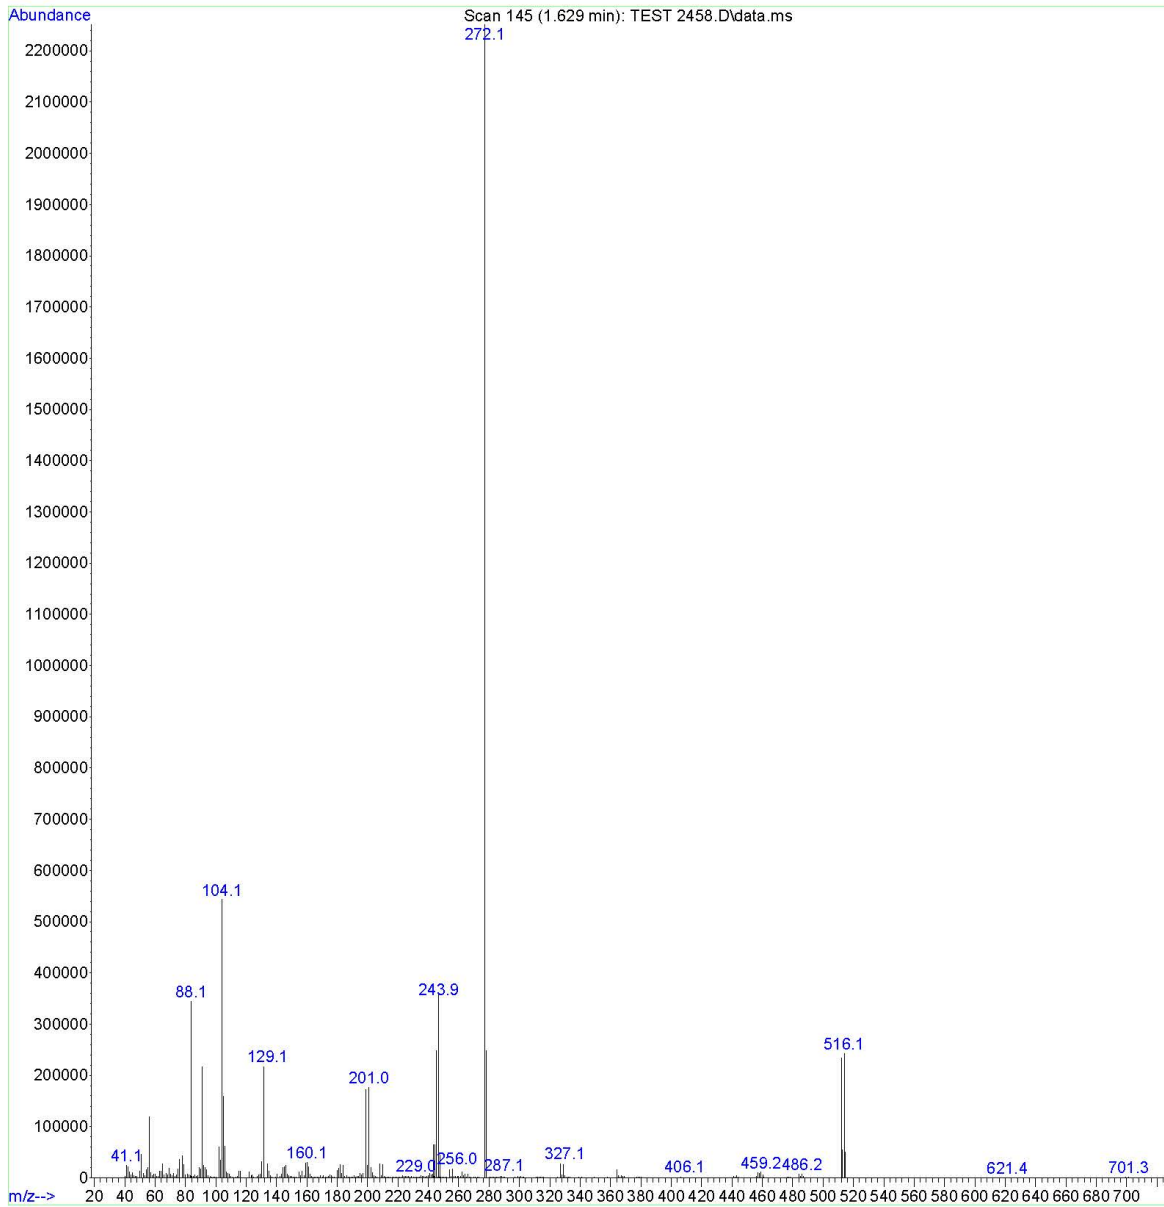

*N*-(4-Nitrophenyl)-2- $\{$ 3-(4-oxo-3,4-dihydroquinazolin-2-yl)quinolin-2-yl $\}$ thioacetamide (**9m**)

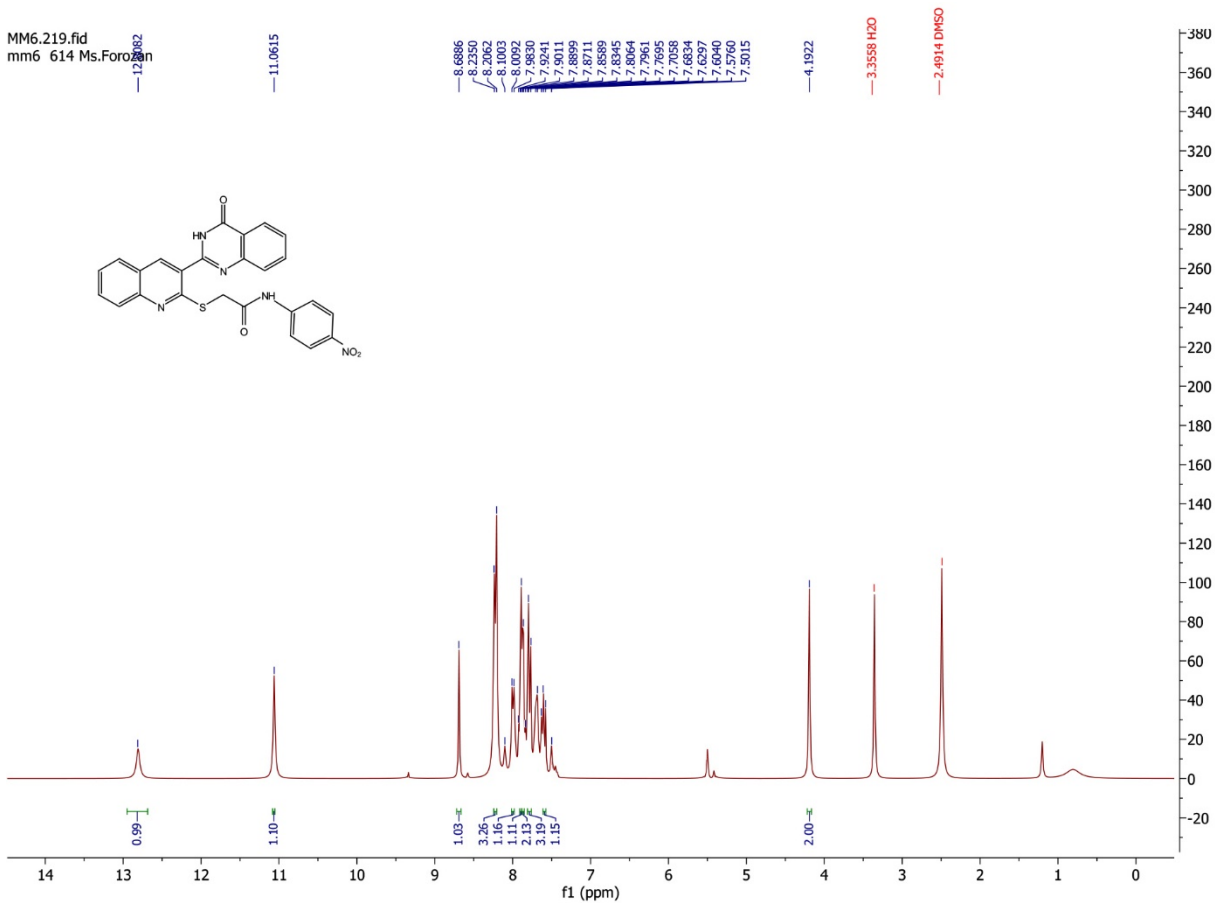

MM6.220.fid  
mm6 614 Ms.Forozan

- 168.3907
- 163.7156
- 156.9131
- 146.9577
- 145.4937
- 142.1032
- 142.0771
- 137.5965
- 134.8138
- 130.6469
- 128.7280
- 127.3637
- 126.4002
- 125.9625
- 125.1332
- 124.2663

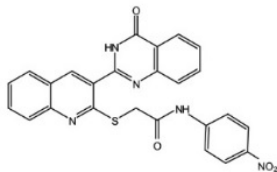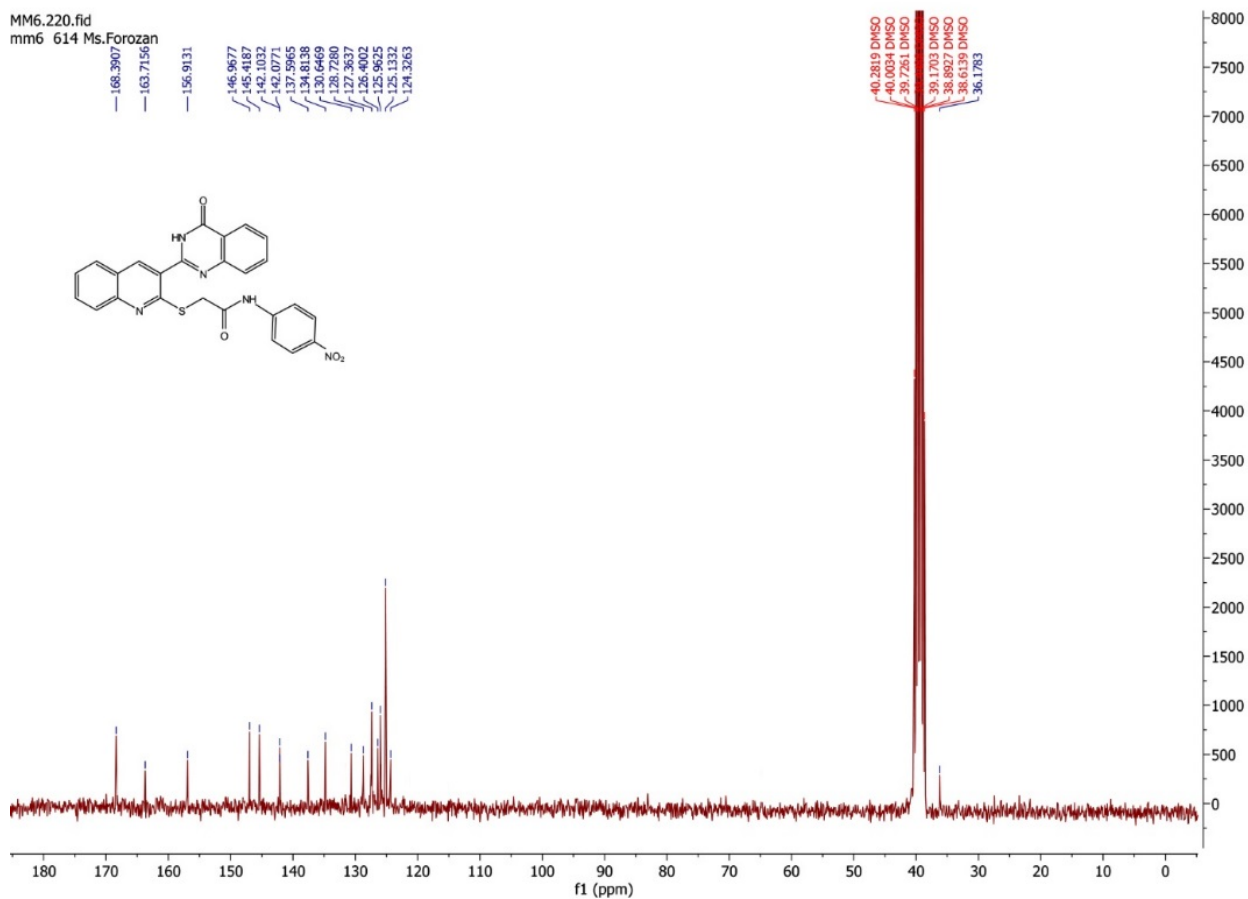

File :C:\MSDCHEM\3\DATA\Snapshot\TEST 2225.D  
Operator :  
Acquired : 28 Jul 2007 7:43 using AcqMethod test000414.M  
Instrument : MSD  
Sample Name: MM6 614  
Misc Info :  
Vial Number: 1

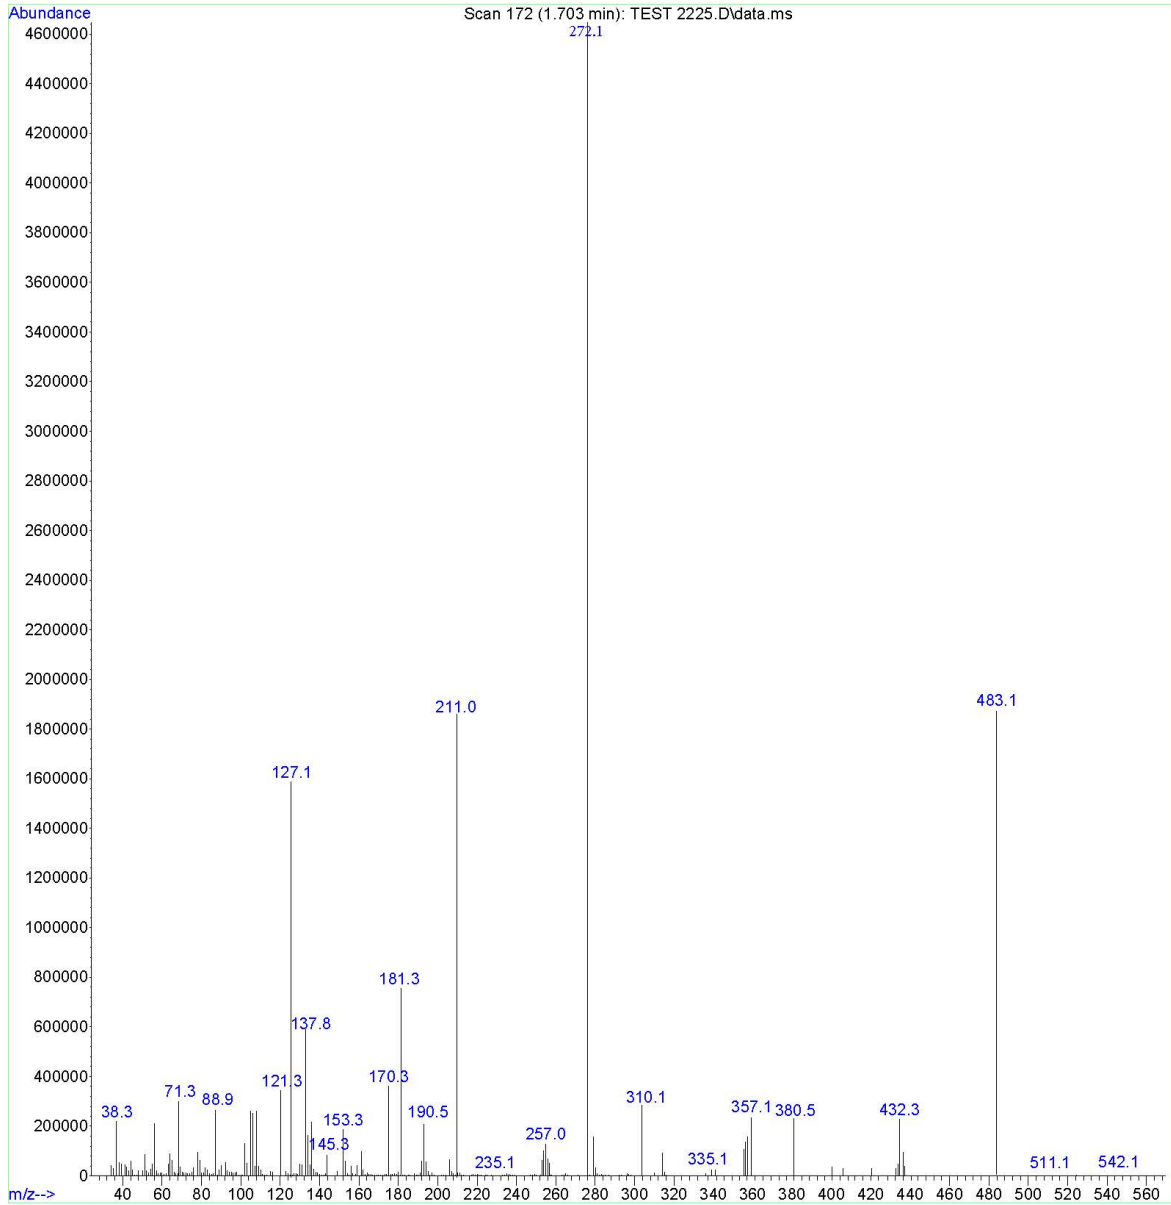

*N*-Benzyl-2- $\{[3-(4\text{-oxo-}3,4\text{-dihydroquinazolin-}2\text{-yl)quinolin-}2\text{-yl]thio}\}$ acetamide (**9n**)

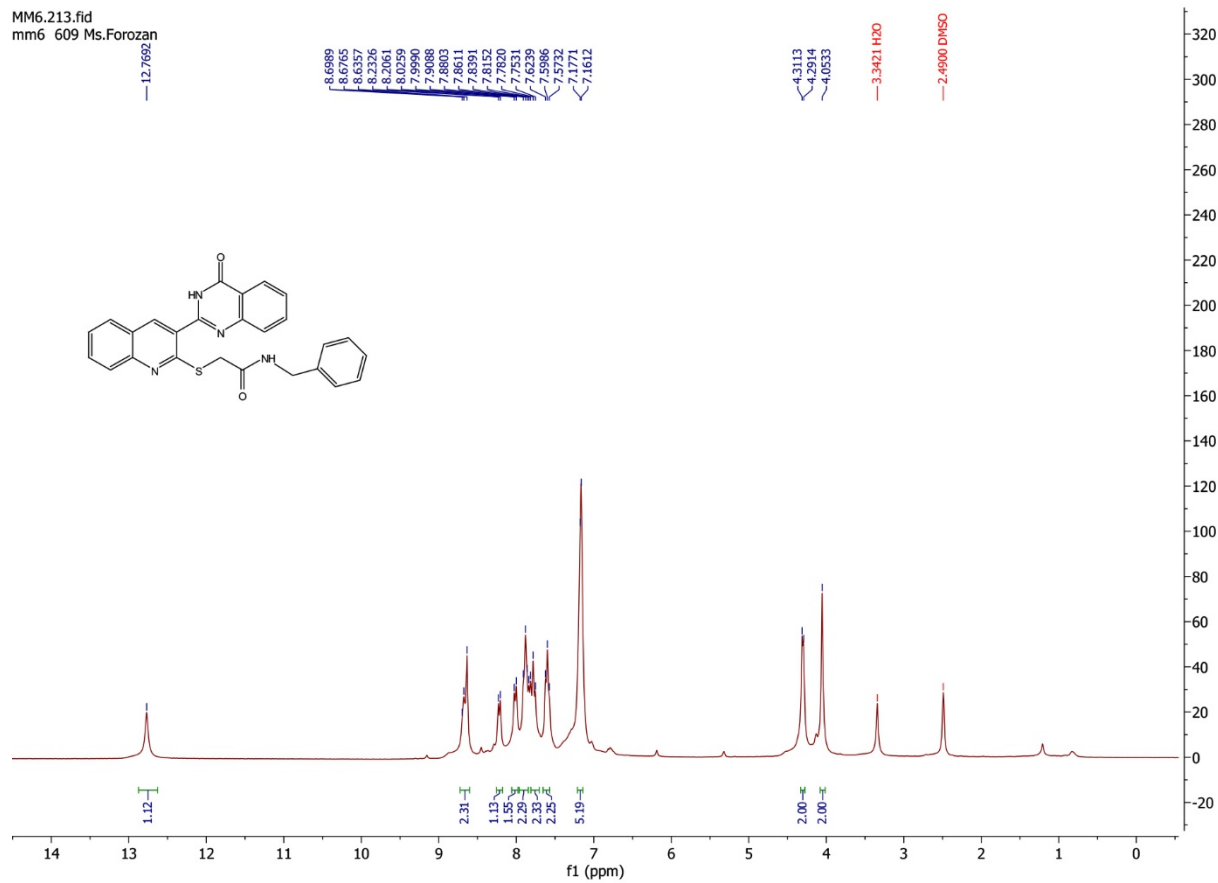



MM6.214.fid  
mm6 609 Ms.Forozan

- 167.9211
- 161.7883
- 158.6132
- 156.7822
- 151.0206
- 149.7123
- 145.1901
- 142.9688
- 139.2100
- 137.4645
- 137.3814
- 136.8105
- 126.9839
- 125.9533
- 121.7413

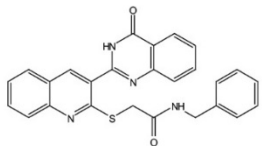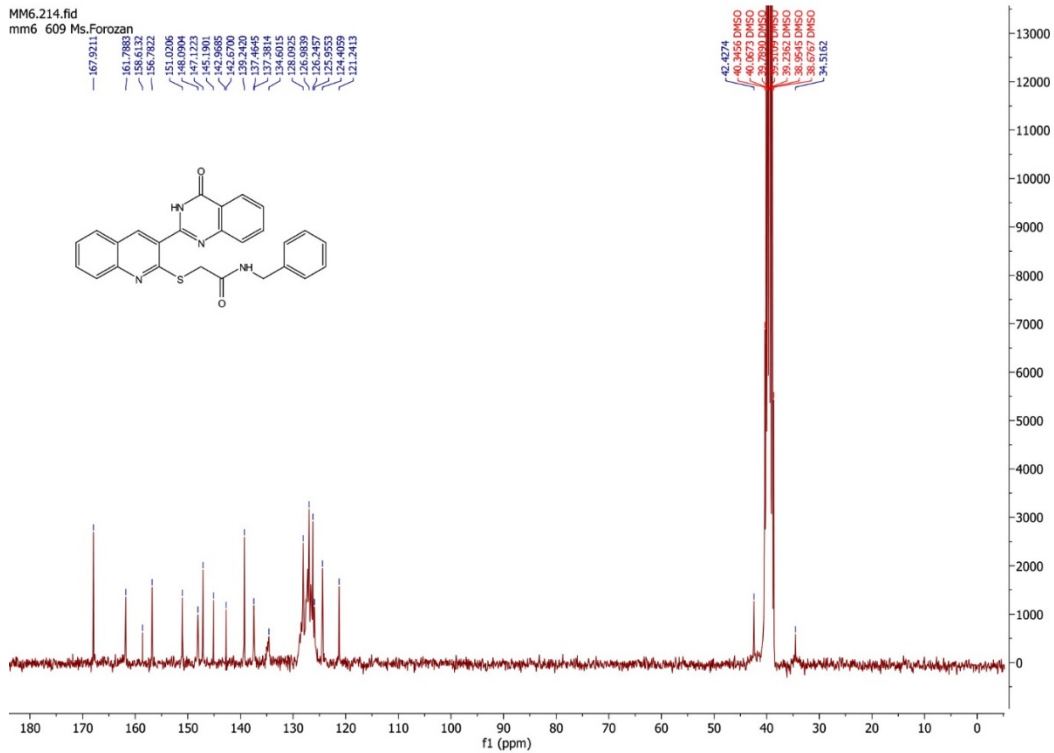

File : C:\MSDCHEM\3\DATA\Snapshot\NO SAMPLE09.D  
Operator :  
Acquired : 3 Jan 2007 21:03 using AcqMethod f1.M  
Instrument : MSD  
Sample Name: MM6 609  
Misc Info :  
Vial Number: 1

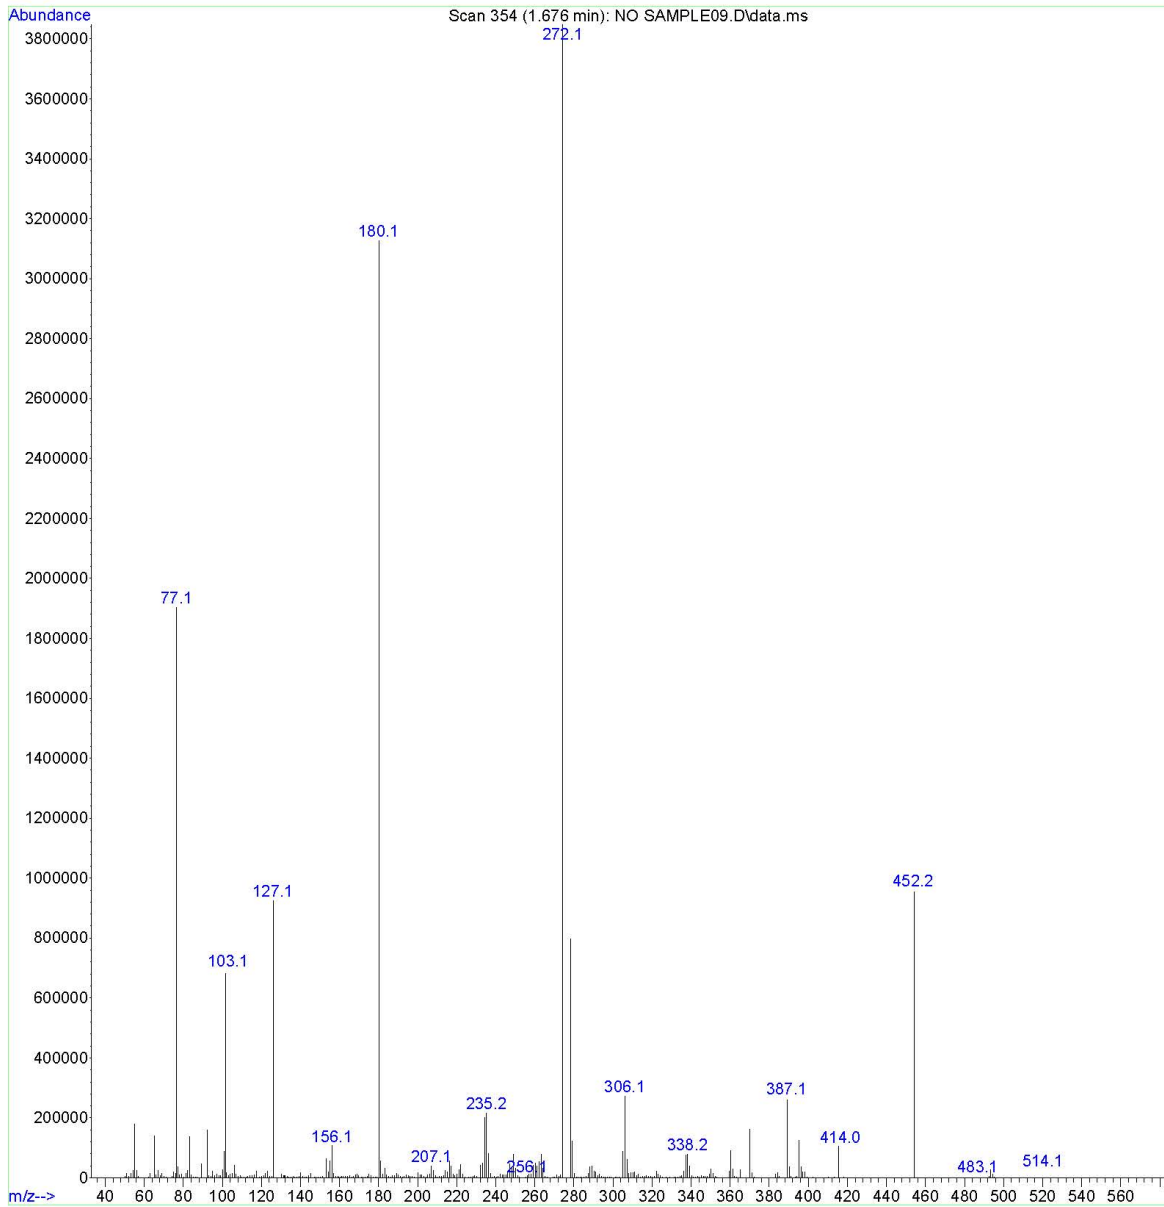

*N*-(4-Methylbenzyl)-2- $\{[3-(4\text{-oxo-3,4-dihydroquinazolin-2-yl})\text{quinolin-2-yl}]\text{thio}\}$ acetamide (**9o**)

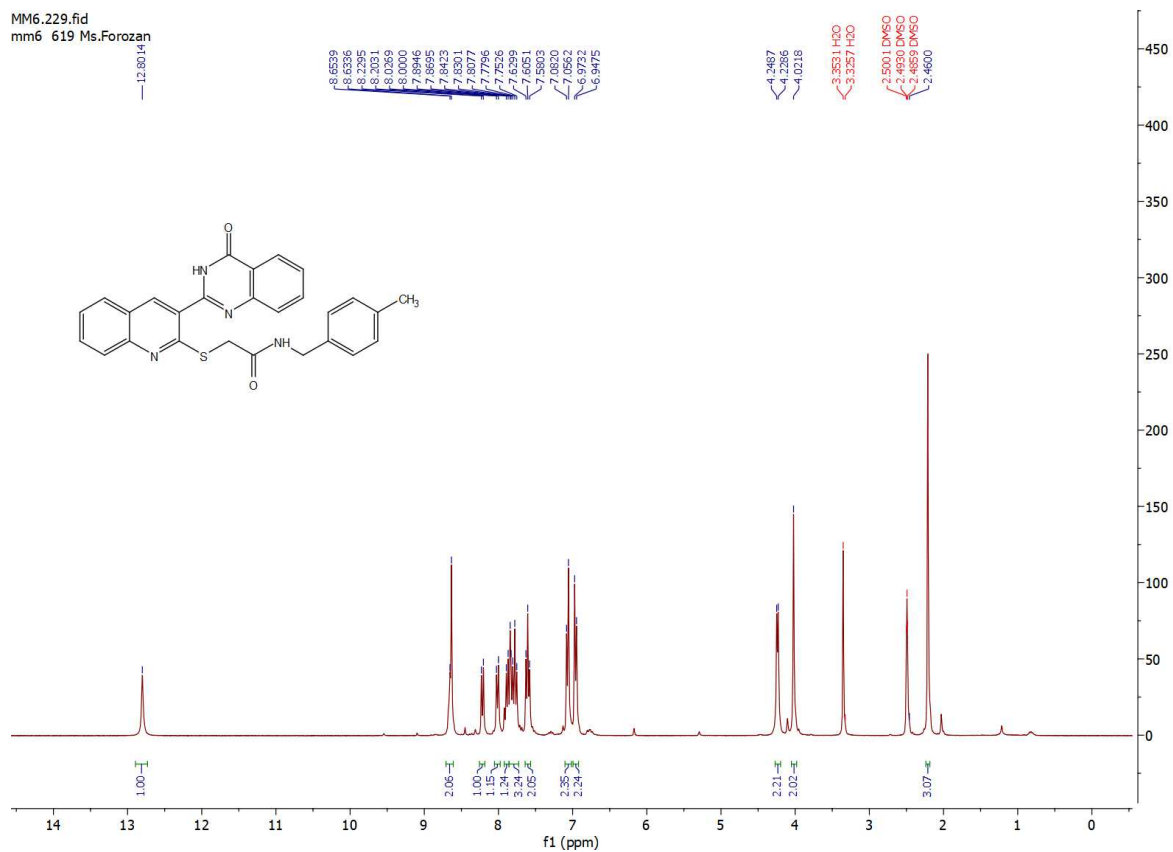

MM6.230.fid

mm6 619 Ms.Forozan

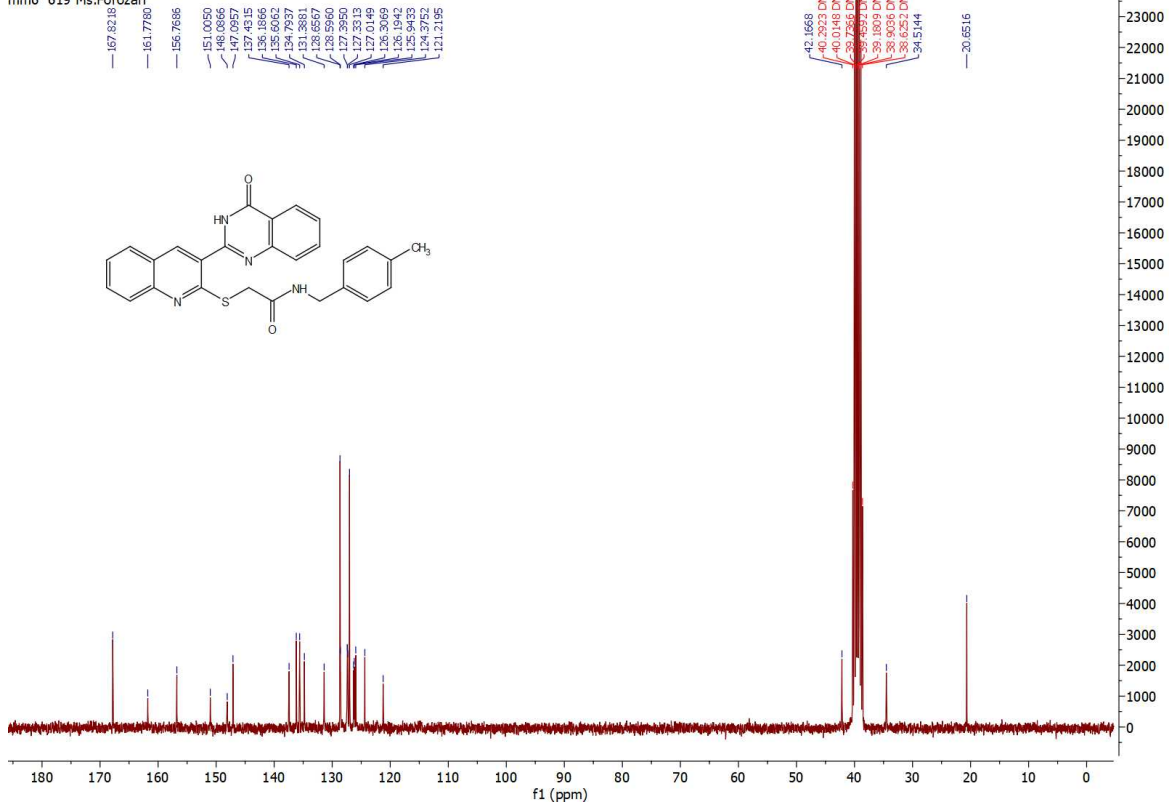

File :C:\MSDCHEM\3\DATA\Snapshot\NO SAMPLE08.D  
Operator :  
Acquired : 3 Jan 2007 22:41 using AcqMethod f1.M  
Instrument : MSD  
Sample Name: MM6 619  
Misc Info :  
Vial Number: 10

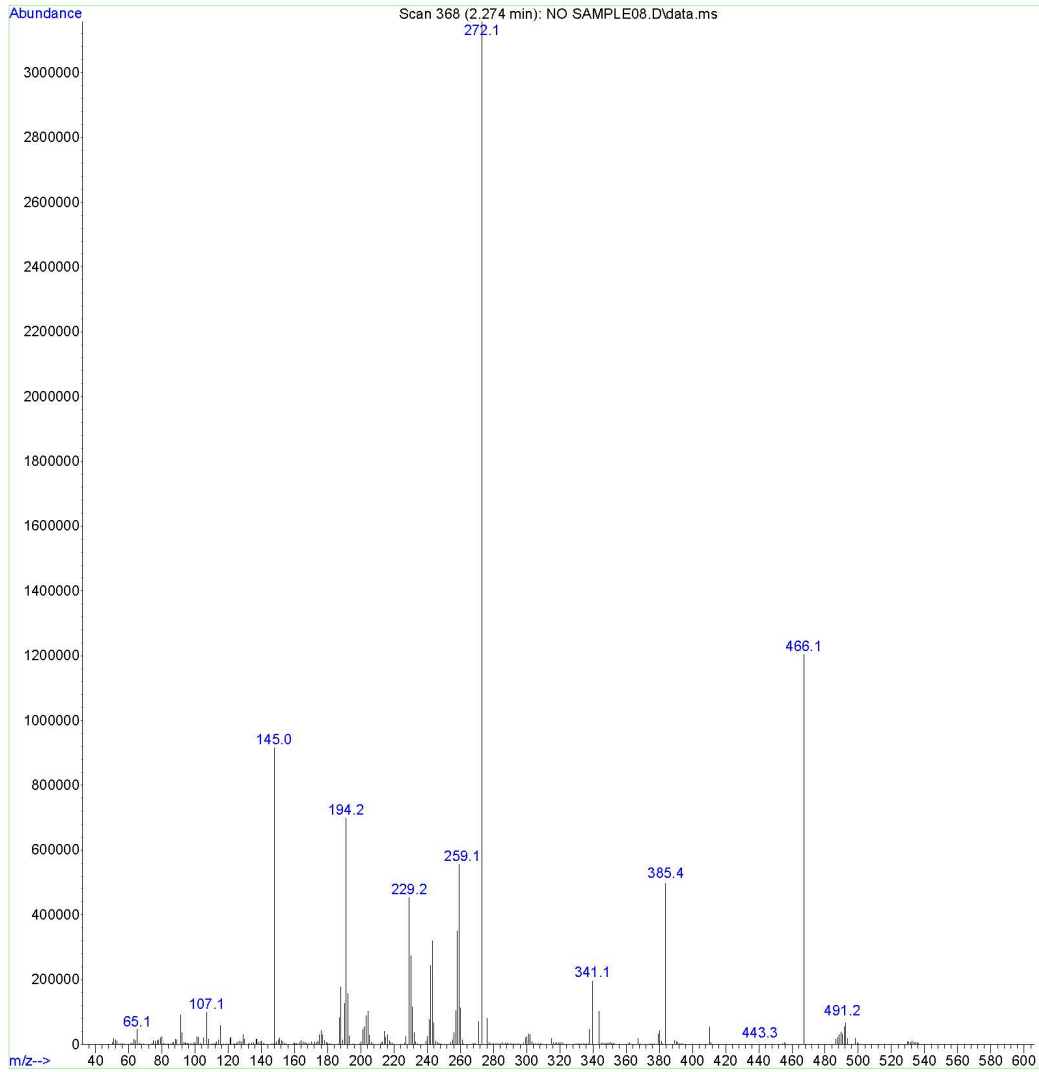

*N*-(4-Fluorobenzyl)-2-{{3-(4-oxo-3,4-dihydroquinazolin-2-yl)quinolin-2-yl}thio}acetamide (**9p**)

MM6.211.fid  
mm6 608 Ms.Forozan

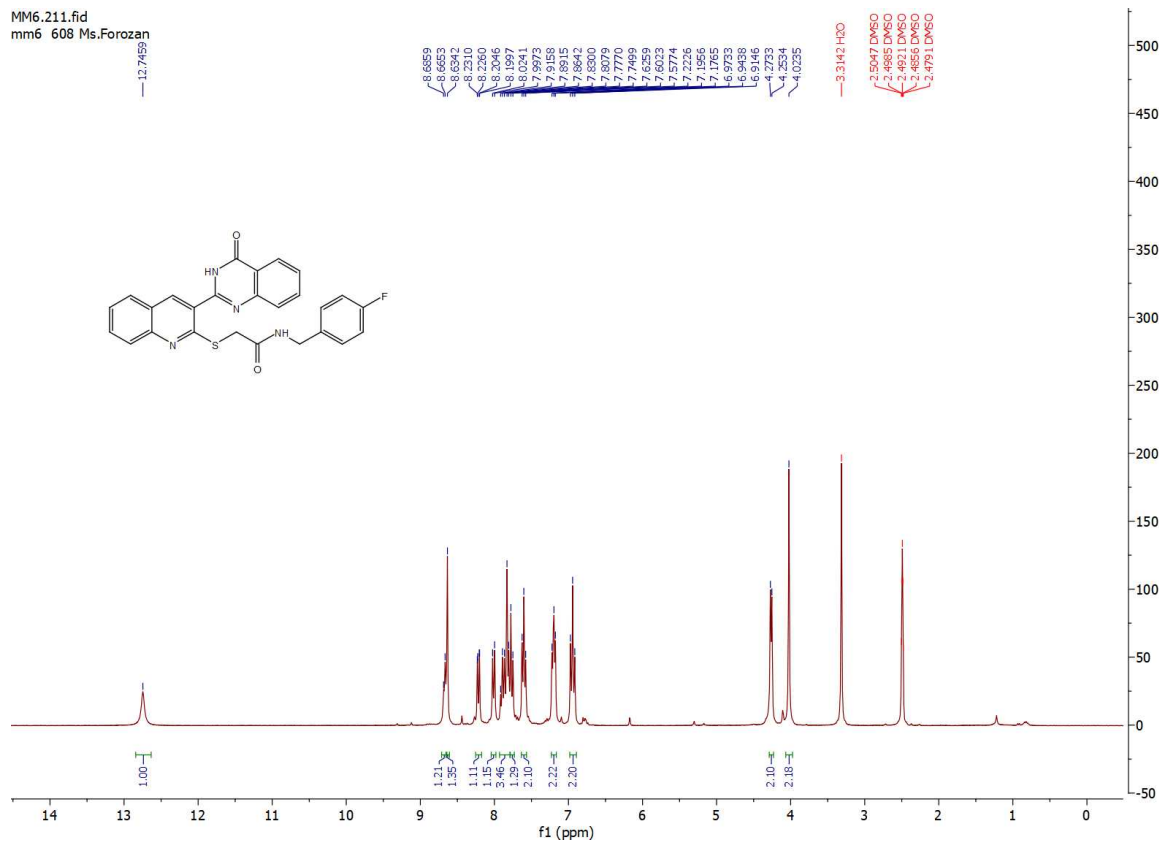

MM6.212.fid  
mm6 608 Ms.Forozan

- 167.9559
- 166.6102
- 161.7756
- 159.4027
- 157.7464
- 150.9960
- 148.0767
- 147.0838
- 146.6559
- 143.0650
- 141.6322
- 137.4777
- 135.4594
- 128.9456
- 127.4498
- 126.2150
- 124.3851
- 121.2304
- 115.0075
- 114.5965

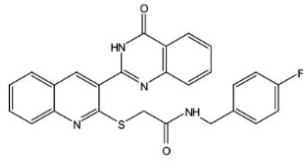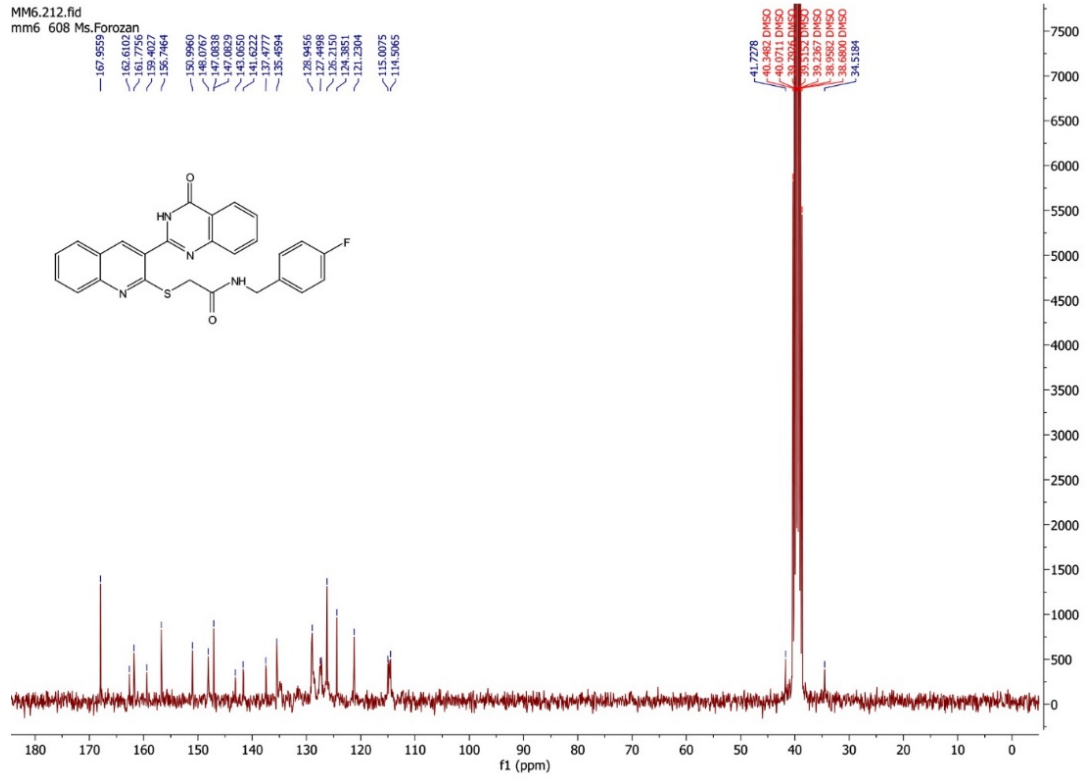

File : C:\MSDCHEM\3\DATA\Snapshot\NO SAMPLE09.D  
Operator :  
Acquired : 3 Jan 2007 21:03 using AcqMethod f1.M  
Instrument : MSD  
Sample Name: MM6 608  
Misc Info :  
Vial Number: 1

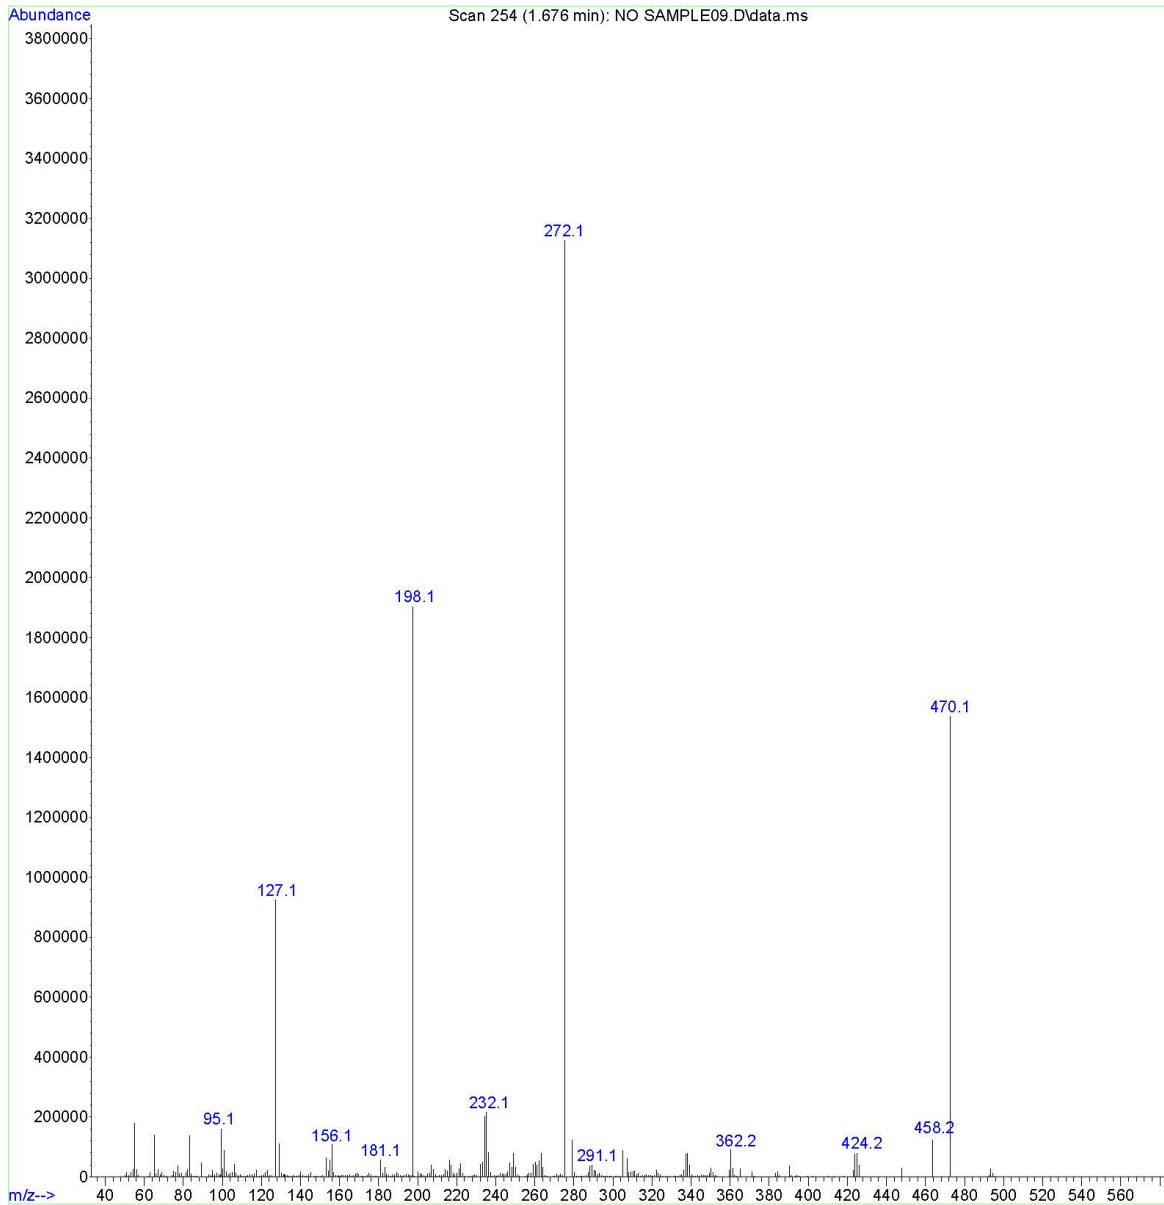

Supplement: d3ra01790g1.pdf [file d3ra01790g1.pdf]
